# Supplementary material for: Understanding the mechanism, thermodynamic and kinetic features of the Kukhtin–Ramirez reaction in carbamate synthesis from carbon dioxide
Source: Royal Society of Chemistry journal article supplement (doi:10.1039/c6ra25769k), 2017-01-01
Supplement: c6ra25769k1.pdf [file c6ra25769k1.pdf]

## Supporting Information

**Table 1(S)**- Absolute values of Gibbs free energy, entropy and enthalpy for the all intermediates of the all PRs and their levels, relative Gibbs free energy for the levels, relative Gibbs free energy of activation for transition state and imaginary frequencies of them

|                                              | Species and levels                | G (a.u)      | H (a.u)      | S (cal.mol <sup>-1</sup> K <sup>-1</sup> ) | $\Delta G_{rel}$ (kcal.mol <sup>-1</sup> ) | $\Delta G_{rel}^\ddagger$ (kcal.mol <sup>-1</sup> ) | $\nu$ (icm <sup>-1</sup> ) |
|----------------------------------------------|-----------------------------------|--------------|--------------|--------------------------------------------|--------------------------------------------|-----------------------------------------------------|----------------------------|
| P(NMe <sub>2</sub> ) <sub>3</sub><br>GAS     | $\alpha$ -keto ester              | -573.362535  | -573.312337  | 105.652                                    |                                            |                                                     |                            |
|                                              | Phenyl carbamic acid              | -476.125214  | -476.082035  | 90.878                                     |                                            |                                                     |                            |
|                                              | P(NMe <sub>2</sub> ) <sub>3</sub> | -744.898169  | -744.842753  | 116.633                                    |                                            |                                                     |                            |
|                                              | Product                           | -974.235937  | -974.165949  | 147.303                                    |                                            |                                                     |                            |
|                                              | In 1A                             | -1318.207016 | -1318.124768 | 173.106                                    |                                            |                                                     |                            |
|                                              | In 1B                             | -1318.210908 | -1318.128256 | 173.956                                    |                                            |                                                     |                            |
|                                              | Level 0                           | -1794.385918 | -1794.237125 | 313.163                                    | 0.00                                       |                                                     |                            |
|                                              | Level 1                           | -1794.375423 | -1794.235998 | 293.446                                    | 6.59                                       |                                                     |                            |
|                                              | Level 2                           | -1794.336122 | -1794.210291 | 264.834                                    | 31.25                                      |                                                     |                            |
|                                              | Level 3 (re face)                 | -1794.344121 | -1794.234431 | 230.862                                    | 26.23                                      |                                                     |                            |
|                                              | Level 4 (si face)                 | -1794.330655 | -1794.221452 | 229.837                                    | 34.68                                      |                                                     |                            |
|                                              | Level 5                           | -1794.349903 | -1794.239409 | 232.553                                    | 22.60                                      |                                                     |                            |
|                                              | Level Product                     | -1794.403809 | -1794.275917 | 269.173                                    | -11.23                                     |                                                     |                            |
|                                              | TS1                               | -1318.188062 | -1318.103256 | 178.49                                     |                                            |                                                     | -363.10                    |
|                                              | Level TS1                         | -1794.313276 | -1794.185291 | 269.368                                    |                                            | 45.58                                               |                            |
| TS2 and its Level (re face)                  | -1794.324546                      | -1794.217364 | 225.583      |                                            | 31.92                                      | -788.03                                             |                            |
| TS2 and its Level (si face)                  | -1794.330655                      | -1794.221452 | 229.837      |                                            | 34.68                                      | -728.02                                             |                            |
| TS3 and its Level                            | -1794.337967                      | -1794.228512 | 230.369      |                                            | 30.09                                      | -271.56                                             |                            |
| P(NMe <sub>2</sub> ) <sub>3</sub><br>SOLVENT | $\alpha$ -keto ester              | -573.371884  | -573.321698  | 105.624                                    |                                            |                                                     |                            |
|                                              | Phenyl carbamic acid              | -476.13493   | -476.091242  | 91.949                                     |                                            |                                                     |                            |
|                                              | P(NMe <sub>2</sub> ) <sub>3</sub> | -744.901066  | -744.845357  | 117.25                                     |                                            |                                                     |                            |
|                                              | Product                           | -974.248658  | -974.178754  | 147.124                                    |                                            |                                                     |                            |
|                                              | In 1B                             | -1318.234232 | -1318.151700 | 173.704                                    |                                            |                                                     |                            |
|                                              | Level 0                           | -1794.40788  | -1794.258297 | 314.823                                    | 0.00                                       |                                                     |                            |
|                                              | Level 1                           | -1794.399724 | -1794.256475 | 301.494                                    | 5.12                                       |                                                     |                            |
|                                              | Level 2                           | -1794.369162 | -1794.242942 | 265.653                                    |                                            |                                                     |                            |
|                                              | Level 3 (re face)                 | -1794.366859 | -1794.257391 | 230.396                                    | 25.74                                      |                                                     |                            |
|                                              | Level 4 (si face)                 | -1794.358633 | -1794.248429 | 231.945                                    | 30.90                                      |                                                     |                            |
|                                              | Level 5                           | -1794.380841 | -1794.268782 | 235.848                                    | 17.00                                      |                                                     |                            |
|                                              | Level Product                     | -1794.42586  | -1794.298216 | 268.647                                    | -11.28                                     |                                                     |                            |
|                                              | TS1                               | -1318.205322 | -1318.119231 | 181.195                                    |                                            |                                                     | 318.16                     |
|                                              | Level TS1                         | -1794.340252 | -1794.210473 | 273.144                                    |                                            | 42.44                                               |                            |
|                                              | TS2 and its Level (re face)       | -1794.350796 | -1794.243564 | 225.687                                    |                                            | 35.82                                               | 939.47                     |
| TS2 and its Level (si face)                  | -1794.353414                      | -1794.246315 | 225.409      |                                            | 34.18                                      | 865.14                                              |                            |
| TS3 and its Level                            | -1794.359592                      | -1794.248615 | 233.57       |                                            | 30.30                                      | 304.25                                              |                            |

| Phase               | PR <sub>3</sub>                                 | Reactants and TSs | G (a.u)      | H (a.u)      | S (cal.mol <sup>-1</sup> K <sup>-1</sup> ) | v (icm <sup>-1</sup> ) |
|---------------------|-------------------------------------------------|-------------------|--------------|--------------|--------------------------------------------|------------------------|
| GAS                 | P(NMe <sub>2</sub> ) <sub>3</sub>               | Reactants         | -1318.250209 | -1318.153963 | 202.568                                    |                        |
|                     |                                                 | TS1               | -1318.188062 | -1318.103256 | 178.49                                     | 363.10                 |
|                     | P(NC <sub>4</sub> H <sub>8</sub> ) <sub>3</sub> | Reactants         | -1550.419709 | -1550.31553  | 219.262                                    |                        |
|                     |                                                 | TS1               | -1550.362184 | -1550.269128 | 195.853                                    | 340.54                 |
|                     | P(Et) <sub>3</sub>                              | Reactants         | -1152.244515 | -1152.157274 | 183.615                                    |                        |
|                     |                                                 | TS1               | -1152.191161 | -1152.114731 | 160.86                                     | 342.23                 |
|                     | P(Me) <sub>3</sub>                              | Reactants         | -1034.38573  | -1034.310401 | 158.544                                    |                        |
|                     |                                                 | TS1               | -1034.325646 | -1034.259925 | 138.322                                    | 350.17                 |
|                     | P(NMe <sub>2</sub> ) <sub>2</sub> Et            | Reactants         | -1262.907399 | -1262.816751 | 190.784                                    |                        |
|                     |                                                 | TS1               | -1262.851481 | -1262.768549 | 174.544                                    | 364.44                 |
|                     | P(NMe <sub>2</sub> )Et <sub>2</sub>             | Reactants         | -1207.575831 | -1207.487664 | 185.562                                    |                        |
|                     |                                                 | TS1               | -1207.520253 | -1207.441872 | 164.967                                    | 321.38                 |
|                     | PPh <sub>3</sub>                                | Reactants         | -1609.472512 | -1609.371227 | 213.172                                    |                        |
|                     |                                                 | TS1               | -1609.413027 | -1609.324098 | 187.167                                    | 317.89                 |
| P(NEt) <sub>3</sub> | Reactants                                       | -1318.287307      | -1318.191798 | 201.015      |                                            |                        |
|                     | TS1                                             | -1318.235862      | -1318.15025  | 180.186      | 317.95                                     |                        |
| SOLVENT             | P(NMe <sub>2</sub> ) <sub>3</sub>               | Reactants         | -1318.264794 | -1318.165233 | 209.545                                    |                        |
|                     |                                                 | TS1               | -1318.205322 | -1318.119231 | 181.195                                    | 318.16                 |
|                     | P(NC <sub>4</sub> H <sub>8</sub> ) <sub>3</sub> | Reactants         | -1550.432808 | -1550.326294 | 224.177                                    |                        |
|                     |                                                 | TS1               | -1550.381139 | -1550.286156 | 199.91                                     | 300.99                 |
|                     | P(Et) <sub>3</sub>                              | Reactants         | -1152.257323 | -1152.169066 | 185.752                                    |                        |
|                     |                                                 | TS1               | -1152.207816 | -1152.130708 | 162.288                                    | 314.17                 |
|                     | P(Me) <sub>3</sub>                              | Reactants         | -1034.397618 | -1034.320071 | 163.212                                    |                        |
|                     |                                                 | TS1               | -1034.343906 | -1034.276872 | 141.084                                    | 326.14                 |
|                     | P(NMe <sub>2</sub> ) <sub>2</sub> Et            | Reactants         | -1262.921676 | -1262.826798 | 199.688                                    |                        |
|                     |                                                 | TS1               | -1262.868202 | -1262.785618 | 173.812                                    | 364.44                 |
|                     | P(NMe <sub>2</sub> )Et <sub>2</sub>             | Reactants         | -1207.58968  | -1207.499367 | 190.081                                    |                        |
|                     |                                                 | TS1               | -1207.537079 | -1207.458538 | 165.304                                    | 321.92                 |
|                     | PPh <sub>3</sub>                                | Reactants         | -1609.487256 | -1609.384865 | 215.501                                    |                        |
|                     |                                                 | TS1               | -1609.429389 | -1609.339925 | 188.294                                    | 320.43                 |
| P(NEt) <sub>3</sub> | Reactants                                       | -1318.306201      | -1318.208418 | 205.801      |                                            |                        |
|                     | TS1                                             | -1318.255638      | -1318.170094 | 180.041      | 349.03                                     |                        |

| Phase                | PR <sub>3</sub>                                  | B3LYP       |              |                                            | MPWB95                      |                             |
|----------------------|--------------------------------------------------|-------------|--------------|--------------------------------------------|-----------------------------|-----------------------------|
|                      |                                                  | G (a.u)     | H (a.u)      | S (cal.mol <sup>-1</sup> K <sup>-1</sup> ) | E (kcal.mol <sup>-1</sup> ) | E (kcal.mol <sup>-1</sup> ) |
| GAS                  | P(NMe <sub>2</sub> ) <sub>3</sub>                | -744.898169 | -744.842753  | 116.633                                    | -745.1070894                | -744.8887612                |
|                      | PO(NMe <sub>2</sub> ) <sub>3</sub>               | -820.167872 | -820.109968  | 121.870                                    | -820.3809752                | -820.1411175                |
|                      | P(NC <sub>4</sub> H <sub>8</sub> ) <sub>3</sub>  | -977.069733 | -977.003425  | 139.555                                    | -977.3801344                | -977.0606733                |
|                      | PO(NC <sub>4</sub> H <sub>8</sub> ) <sub>3</sub> | -1052.34250 | -1052.275322 | 141.397                                    | -1052.659006                | -1052.317645                |
|                      | P(Et) <sub>3</sub>                               | -578.893766 | -578.846146  | 100.226                                    | -579.0566507                | -578.918477                 |
|                      | PO(Et) <sub>3</sub>                              | -654.151981 | -654.102777  | 103.559                                    | -654.3191198                | -654.153349                 |
|                      | P(Me) <sub>3</sub>                               | -461.034443 | -460.997348  | 78.073                                     | -461.1175544                | -461.0518196                |
|                      | PO(Me) <sub>3</sub>                              | -536.291036 | -536.251832  | 82.513                                     | -536.3775525                | -536.2845332                |
|                      | P(NMe <sub>2</sub> ) <sub>2</sub> Et             | -689.556594 | -689.503748  | 111.225                                    | -689.7500621                | -689.5582148                |
|                      | PO(NMe <sub>2</sub> ) <sub>2</sub> Et            | -764.827948 | -764.773229  | 115.166                                    | -765.0260304                | -764.8106671                |
|                      | P(NMe <sub>2</sub> )Et <sub>2</sub>              | -634.227310 | -634.176452  | 107.039                                    | -634.4046777                | -634.2385421                |
|                      | PO(NMe <sub>2</sub> )Et <sub>2</sub>             | -709.490733 | -709.437481  | 112.080                                    | -709.6717024                | -709.4805868                |
|                      | PPh <sub>3</sub>                                 | -1036.12132 | -1036.058616 | 131.978                                    | -1036.348929                | -1036.01116                 |
|                      | POPh <sub>3</sub>                                | -1111.37377 | -1111.308976 | 136.384                                    | -1111.604969                | -1111.239987                |
| P(NEt) <sub>3</sub>  | -744.940385                                      | -744.882388 | 122.066      | -745.1479067                               | -744.9260242                |                             |
| PO(NEt) <sub>3</sub> | -820.210370                                      | -820.151407 | 124.097      | -820.4234278                               | -820.1803554                |                             |
| SOLVENT              | P(NMe <sub>2</sub> ) <sub>3</sub>                | -744.901066 | -744.845357  | 117.25                                     | -745.109256                 | -744.8912082                |
|                      | PO(NMe <sub>2</sub> ) <sub>3</sub>               | -820.177202 | -820.119462  | 121.523                                    | -820.390247                 | -820.1507834                |
|                      | P(NC <sub>4</sub> H <sub>8</sub> ) <sub>3</sub>  | -977.073844 | -977.006243  | 142.279                                    | -977.3825183                | -977.0635945                |
|                      | PO(NC <sub>4</sub> H <sub>8</sub> ) <sub>3</sub> | -1052.35410 | -1052.287046 | 141.128                                    | -1052.670324                | -1052.329514                |
|                      | P(Et) <sub>3</sub>                               | -578.896840 | -578.849144  | 100.383                                    | -579.0594004                | -578.9210397                |
|                      | PO(Et) <sub>3</sub>                              | -654.164655 | -654.115565  | 103.317                                    | -654.3317884                | -654.1661374                |
|                      | P(Me) <sub>3</sub>                               | -461.037075 | -461.000101  | 77.818                                     | -461.1202332                | -461.0547817                |
|                      | PO(Me) <sub>3</sub>                              | -536.304586 | -536.265346  | 82.586                                     | -536.3909291                | -536.2982629                |
|                      | P(NMe <sub>2</sub> ) <sub>2</sub> Et             | -689.559872 | -689.506658  | 111.998                                    | -689.7526012                | -689.5608467                |
|                      | PO(NMe <sub>2</sub> ) <sub>2</sub> Et            | -764.838871 | -764.784095  | 115.286                                    | -765.0366305                | -764.8215088                |
|                      | P(NMe <sub>2</sub> )Et <sub>2</sub>              | -634.229760 | -634.179400  | 105.992                                    | -634.4073751                | -634.2414499                |
|                      | PO(NMe <sub>2</sub> )Et <sub>2</sub>             | -709.501876 | -709.449131  | 111.011                                    | -709.6832867                | -709.4922571                |
|                      | PPh <sub>3</sub>                                 | -1036.12744 | -1036.064444 | 132.602                                    | -1036.354645                | -1036.017548                |
|                      | POPh <sub>3</sub>                                | -1111.38611 | -1111.321378 | 136.243                                    | -1111.617381                | -1111.252748                |
| P(NEt) <sub>3</sub>  | -744.945423                                      | -744.887492 | 121.927      | -745.1525984                               | -744.9308978                |                             |
| PO(NEt) <sub>3</sub> | -820.224203                                      | -820.164806 | 125.012      | -820.4363926                               | -820.1936324                |                             |

## Cartesian coordinate of the specious

### Gas Phase

$\alpha$ -keto ester:

0 1  
C -0.51441500 0.86827500 0.16996900  
C 0.84820200 0.28691300 0.05748500  
C 1.07586100 -1.09885200 0.00571100  
C 1.93686800 1.17354400 -0.02843400  
C 2.37583800 -1.58742200 -0.13152600  
H 0.24654500 -1.79188800 0.09148500  
C 3.23135900 0.68119300 -0.16332300  
H 1.74266700 2.24028300 0.01057300  
C 3.45261500 -0.70086100 -0.21570500  
H 2.54783000 -2.65885400 -0.16714700  
H 4.06886200 1.36924900 -0.22884000  
H 4.46347300 -1.08437100 -0.32088200  
C -1.71886300 -0.08424300 0.28574600  
O -0.73430700 2.06768600 0.22145600  
O -1.82729100 -0.91813400 1.16218600  
O -2.63616100 0.17295700 -0.65146900  
C -3.85771100 -0.59496400 -0.57217600  
H -4.36854400 -0.38733400 0.37054000  
H -3.63958400 -1.66314700 -0.64070700  
H -4.45770500 -0.26550700 -1.41887600

Phenyl carbamic acid:

0 1  
C 2.18351100 0.10888300 -0.00037900  
O 3.30446600 -0.67504800 0.00046400  
O 2.22711100 1.32625000 0.00026200  
N 1.07514100 -0.68707800 -0.00046400  
H 1.26135300 -1.68039500 -0.00039200  
C -0.28359800 -0.29973600 -0.00022900  
C -0.70182000 1.03906100 -0.00010200  
C -1.24050400 -1.32748400 -0.00016000  
C -2.06905700 1.32670600 0.00010000  
H 0.03307200 1.83222400 -0.00016500  
C -2.60036700 -1.02308300 0.00003600  
H -0.91785100 -2.36626400 -0.00026900  
C -3.02482100 0.30864100 0.00016800  
H -2.38404100 2.36625800 0.00020000  
H -3.32681300 -1.83038900 0.00008500  
H -4.08376600 0.54738200 0.00032700  
H 4.05937000 -0.06681300 0.00104300

P(NMe<sub>2</sub>)<sub>3</sub>:

0 1  
P 0.00000300 -0.03909500 -0.74327200  
N 0.00000500 1.53014600 0.07142800  
N -1.42407500 -0.67334800 0.00091900  
N 1.42410400 -0.67332700 0.00089900  
C -1.20279400 2.33543600 -0.16367000  
H -2.10088600 1.74545100 0.02272900  
H -1.19935200 3.19012400 0.52343600  
H -1.25761600 2.73135400 -1.19379600  
C 1.20281500 2.33542600 -0.16364400  
H 1.19935800 3.19011900 0.52345600  
H 2.10089600 1.74543400 0.02278300  
H 1.25766700 2.73133700 -1.19377100

|   |             |             |             |
|---|-------------|-------------|-------------|
| C | -2.14655400 | -1.71438200 | -0.71923200 |
| H | -1.91004200 | -2.72507000 | -0.34626200 |
| H | -3.23111400 | -1.56708400 | -0.61674000 |
| H | -1.89609500 | -1.67546000 | -1.78307500 |
| C | -1.71024700 | -0.64552500 | 1.43029600  |
| H | -2.78827200 | -0.50542100 | 1.59530900  |
| H | -1.41570800 | -1.58208000 | 1.93159700  |
| H | -1.18309300 | 0.18642400  | 1.90053700  |
| C | 2.14651700  | -1.71442100 | -0.71923600 |
| H | 3.23108500  | -1.56721900 | -0.61669200 |
| H | 1.90989800  | -2.72509300 | -0.34629000 |
| H | 1.89610900  | -1.67545900 | -1.78308900 |
| C | 1.71023900  | -0.64554400 | 1.43028600  |
| H | 2.78827200  | -0.50554200 | 1.59532400  |
| H | 1.18315000  | 0.18645100  | 1.90052000  |
| H | 1.41560100  | -1.58207500 | 1.93157400  |

Product:

|     |             |             |             |
|-----|-------------|-------------|-------------|
| 0 1 |             |             |             |
| C   | -1.77977500 | 0.63118700  | -0.84908500 |
| C   | -2.52212800 | -0.56387800 | -0.28750700 |
| C   | -2.40733400 | -0.97470300 | 1.04890200  |
| C   | -3.33171100 | -1.30448800 | -1.15987000 |
| C   | -3.08934000 | -2.10826400 | 1.49326800  |
| H   | -1.78955100 | -0.40774700 | 1.73372400  |
| C   | -4.01393400 | -2.43916100 | -0.71498000 |
| H   | -3.43161900 | -0.99109100 | -2.19651900 |
| C   | -3.89209400 | -2.84371900 | 0.61586000  |
| H   | -2.99612400 | -2.41530400 | 2.53092500  |
| H   | -4.63910300 | -2.99977200 | -1.40382900 |
| H   | -4.42253400 | -3.72340100 | 0.96924800  |
| C   | -1.81752200 | 1.90145400  | 0.01566100  |
| O   | -2.61460100 | 2.09930600  | 0.90497400  |
| O   | -0.93799000 | 2.81399400  | -0.43390100 |
| C   | -0.89948900 | 4.05660900  | 0.29642400  |
| H   | -1.87795900 | 4.54176500  | 0.27414200  |
| H   | -0.15243600 | 4.66596100  | -0.21090800 |
| C   | 0.53808400  | 0.20208900  | -0.34043000 |
| O   | 0.37202900  | 0.44345200  | 0.84243200  |
| O   | -0.43734000 | 0.29504100  | -1.28977200 |
| N   | 1.69852400  | -0.19048600 | -0.94640300 |
| H   | 1.62583000  | -0.34183100 | -1.94296900 |
| C   | 2.96760200  | -0.40116300 | -0.36509000 |
| C   | 3.22564800  | -0.24223100 | 1.00490100  |
| C   | 4.00683400  | -0.79097200 | -1.22606100 |
| C   | 4.51519000  | -0.47591600 | 1.48912600  |
| H   | 2.42792900  | 0.05687400  | 1.67049400  |
| C   | 5.28725500  | -1.02029200 | -0.72675200 |
| H   | 3.80968900  | -0.91469200 | -2.28852400 |
| C   | 5.55124700  | -0.86385100 | 0.63701600  |
| H   | 4.70488300  | -0.35107700 | 2.55140000  |
| H   | 6.07815200  | -1.32157000 | -1.40738700 |
| H   | 6.54827900  | -1.04206500 | 1.02760700  |
| H   | -2.25523100 | 0.91574900  | -1.79342400 |
| H   | -0.60785500 | 3.87105500  | 1.33268200  |

In 1A:

|     |            |             |             |
|-----|------------|-------------|-------------|
| 0 1 |            |             |             |
| P   | 1.38962500 | -0.21524100 | 0.00001700  |
| N   | 2.19485400 | 0.23224600  | -1.43591400 |
| N   | 2.19471700 | 0.23268500  | 1.43587500  |
| N   | 1.93708600 | -1.85130000 | 0.00026500  |
| C   | 2.47975000 | 1.60867600  | -1.85068600 |
| H   | 2.70245200 | 2.24947500  | -1.00246800 |
| H   | 3.36369300 | 1.58213100  | -2.49944700 |
| H   | 1.64865200 | 2.05718600  | -2.41136200 |
| C   | 2.08579100 | -0.64634200 | -2.60816300 |

|   |             |             |             |
|---|-------------|-------------|-------------|
| H | 3.03912100  | -0.64808000 | -3.15088500 |
| H | 1.85275500  | -1.66724700 | -2.31356500 |
| H | 1.30113100  | -0.29336000 | -3.29355200 |
| C | 2.08600800  | -0.64571500 | 2.60829600  |
| H | 3.03945500  | -0.64727300 | 3.15081500  |
| H | 1.30146800  | -0.29267100 | 3.29378900  |
| H | 1.85298900  | -1.66669300 | 2.31394300  |
| C | 2.47943900  | 1.60923200  | 1.85038100  |
| H | 1.64833500  | 2.05766900  | 2.41111200  |
| H | 3.36347300  | 1.58295400  | 2.49902800  |
| H | 2.70188400  | 2.24994500  | 1.00203600  |
| C | 1.14819700  | -3.07432800 | 0.00054500  |
| H | 1.37982300  | -3.68686700 | -0.88625600 |
| H | 1.37993600  | -3.68654300 | 0.88754200  |
| H | 0.08539600  | -2.85800000 | 0.00057200  |
| C | 3.36889700  | -2.12135900 | 0.00027200  |
| H | 3.65834400  | -2.70584700 | -0.88733300 |
| H | 3.94186800  | -1.19499000 | 0.00010500  |
| H | 3.65838900  | -2.70556300 | 0.88804900  |
| C | -1.23257300 | 0.26397700  | -0.00017300 |
| C | -2.58371200 | -0.25019800 | -0.00013700 |
| C | -3.70735000 | 0.61301600  | -0.00048800 |
| C | -2.83025200 | -1.64191700 | 0.00025500  |
| C | -5.00135700 | 0.09906300  | -0.00041300 |
| H | -3.55523800 | 1.68522400  | -0.00082300 |
| C | -4.13163200 | -2.14431700 | 0.00031400  |
| H | -1.99399800 | -2.33039600 | 0.00052100  |
| C | -5.23064100 | -1.28215000 | -0.00001300 |
| H | -5.84242100 | 0.78785200  | -0.00068500 |
| H | -4.28431100 | -3.22065000 | 0.00061900  |
| H | -6.24300500 | -1.67505200 | 0.00003100  |
| C | -0.70432400 | 1.51634900  | -0.00037000 |
| O | -0.18132100 | -0.69549100 | -0.00002200 |
| O | 0.60436000  | 1.61488300  | -0.00027700 |
| O | -1.45188900 | 2.64642300  | -0.00080900 |
| C | -0.74785600 | 3.89349400  | 0.00071000  |
| H | -0.12436700 | 3.99424600  | 0.89389800  |
| H | -1.52439100 | 4.65929100  | 0.00000300  |
| H | -0.12190500 | 3.99505600  | -0.89064700 |

In 1B:

|     |             |             |             |
|-----|-------------|-------------|-------------|
| 0 1 |             |             |             |
| P   | 1.24088900  | -0.58891400 | -0.01326900 |
| N   | 1.25518000  | -0.01670900 | 1.53823400  |
| N   | 0.98252000  | -2.22250200 | 0.12386800  |
| N   | 2.67499000  | -0.33943000 | -0.80005400 |
| C   | 0.06621600  | -0.14532000 | 2.40509500  |
| H   | -0.63012000 | -0.88369500 | 2.00686500  |
| H   | 0.38829800  | -0.45785900 | 3.40636200  |
| H   | -0.46360300 | 0.80958500  | 2.47055300  |
| C   | 2.16509900  | 1.05991100  | 1.94963200  |
| H   | 2.50577700  | 0.85888200  | 2.97167200  |
| H   | 3.03538600  | 1.09869200  | 1.29392300  |
| H   | 1.66212500  | 2.03180200  | 1.91926000  |
| C   | 0.72357600  | -3.00708100 | -1.08862800 |
| H   | 1.57400000  | -3.66788000 | -1.30500100 |
| H   | -0.17413000 | -3.61986100 | -0.95320300 |
| H   | 0.56306300  | -2.35155500 | -1.94534700 |
| C   | 1.18613400  | -3.02775500 | 1.32827400  |
| H   | 0.25391700  | -3.53313400 | 1.60861500  |
| H   | 1.95216800  | -3.79375100 | 1.14481700  |
| H   | 1.51203500  | -2.40319600 | 2.15854800  |
| C   | 2.93623600  | 0.80054200  | -1.69103100 |
| H   | 3.71202300  | 1.44914300  | -1.26292900 |
| H   | 3.28973300  | 0.42511300  | -2.65868900 |
| H   | 2.02842100  | 1.38347000  | -1.82861100 |
| C   | 3.84932500  | -1.16055700 | -0.50394200 |
| H   | 4.59614800  | -0.59576500 | 0.07078100  |

|   |             |             |             |
|---|-------------|-------------|-------------|
| H | 3.57132700  | -2.04780600 | 0.06704400  |
| H | 4.31382500  | -1.48659700 | -1.44208600 |
| C | -0.95792300 | 0.83488400  | -0.45636000 |
| C | -2.21635000 | 0.14043300  | -0.35772100 |
| C | -3.36346300 | 0.75200900  | 0.22475900  |
| C | -2.38148800 | -1.18505000 | -0.83786900 |
| C | -4.56998200 | 0.06532400  | 0.32576800  |
| H | -3.28217100 | 1.77216800  | 0.57740400  |
| C | -3.59808100 | -1.85969700 | -0.72865900 |
| H | -1.55449800 | -1.67481100 | -1.33468300 |
| C | -4.70831300 | -1.24904100 | -0.14029500 |
| H | -5.42128000 | 0.57037000  | 0.77664500  |
| H | -3.67891900 | -2.87108100 | -1.12195100 |
| H | -5.65525700 | -1.77424200 | -0.05745700 |
| C | -0.70755700 | 2.19655000  | -0.22530200 |
| O | 0.16544000  | 0.05388700  | -0.98900000 |
| O | -1.50125800 | 3.04798900  | 0.20447900  |
| O | 0.62352500  | 2.58000200  | -0.50683600 |
| C | 0.86968600  | 3.98143400  | -0.37466000 |
| H | 0.23587000  | 4.55954000  | -1.05365300 |
| H | 1.92220400  | 4.12335600  | -0.63373000 |
| H | 0.68114000  | 4.32878400  | 0.64605000  |

In 2:

|     |             |             |             |
|-----|-------------|-------------|-------------|
| O 1 |             |             |             |
| P   | -1.93795200 | -1.50238000 | -0.10819800 |
| N   | -1.38908800 | -1.45748000 | -1.65031800 |
| N   | -1.34393000 | -2.78419400 | 0.73890800  |
| N   | -3.59556100 | -1.55738200 | -0.20065500 |
| C   | -0.25297900 | -2.26509800 | -2.13054100 |
| H   | 0.02624100  | -3.01426900 | -1.39160900 |
| H   | -0.55409000 | -2.77151900 | -3.05565300 |
| H   | 0.60083500  | -1.61107300 | -2.31720700 |
| C   | -1.78067400 | -0.38363800 | -2.58458800 |
| H   | -2.12457300 | -0.83537200 | -3.52312700 |
| H   | -2.59202900 | 0.21447500  | -2.16653000 |
| H   | -0.91333700 | 0.25600300  | -2.77151300 |
| C   | -0.01305000 | -2.75889100 | 1.37853200  |
| H   | -0.12835100 | -2.86359000 | 2.46321300  |
| H   | 0.58582500  | -3.59561800 | 0.99965700  |
| H   | 0.51971500  | -1.83641500 | 1.14478600  |
| C   | -1.99403300 | -4.09474300 | 0.72059000  |
| H   | -1.45181000 | -4.80317200 | 0.07969600  |
| H   | -2.01435800 | -4.49915800 | 1.73906000  |
| H   | -3.02231200 | -4.01696600 | 0.36413800  |
| C   | -4.42502000 | -1.22909500 | 0.96400700  |
| H   | -5.21159200 | -0.52532400 | 0.66900800  |
| H   | -4.89697500 | -2.13295400 | 1.37243200  |
| H   | -3.82146600 | -0.76314900 | 1.74170200  |
| C   | -4.32966800 | -2.17116900 | -1.30865000 |
| H   | -5.08439400 | -1.47047300 | -1.68547900 |
| H   | -3.65187900 | -2.42457800 | -2.12327100 |
| H   | -4.84377400 | -3.08500900 | -0.97969600 |
| C   | -0.89464400 | 0.98290000  | 0.47427300  |
| C   | -1.85365600 | 2.09455000  | 0.09871300  |
| C   | -1.54518600 | 2.90581600  | -0.99998700 |
| C   | -3.00847400 | 2.35810200  | 0.84781400  |
| C   | -2.38973800 | 3.96284800  | -1.35081200 |
| H   | -0.63917400 | 2.70679100  | -1.56577300 |
| C   | -3.85440200 | 3.41038900  | 0.49253900  |
| H   | -3.24192200 | 1.74458300  | 1.71338000  |
| C   | -3.54666400 | 4.21517700  | -0.60953500 |
| H   | -2.14046900 | 4.58998000  | -2.20199600 |
| H   | -4.74609800 | 3.60943200  | 1.08058100  |
| H   | -4.20209900 | 5.03720200  | -0.88298500 |
| C   | -0.00371400 | 1.38104900  | 1.65213200  |
| O   | -1.61688100 | -0.24616600 | 0.81619000  |
| O   | 0.60531000  | 2.42813300  | 1.64792000  |

|   |             |             |             |
|---|-------------|-------------|-------------|
| O | 0.03992100  | 0.47944100  | 2.64474000  |
| C | 0.97897900  | 0.78196900  | 3.69856200  |
| H | 0.73512600  | 1.73997300  | 4.16340000  |
| H | 1.99183800  | 0.82018900  | 3.29209300  |
| C | 2.03209100  | 0.19008500  | -1.04818600 |
| O | 1.15849000  | 0.68454100  | -1.83011800 |
| O | 1.81220000  | -0.56100500 | -0.05940600 |
| N | 3.36201800  | 0.54567600  | -1.37225300 |
| H | 3.40738400  | 1.17529700  | -2.16072300 |
| C | 4.57331600  | 0.24016500  | -0.75295300 |
| C | 4.69250100  | -0.61196300 | 0.36318400  |
| C | 5.74761500  | 0.81338200  | -1.28617700 |
| C | 5.95020300  | -0.86697200 | 0.91331400  |
| H | 3.79447500  | -1.05204100 | 0.77455000  |
| C | 6.99492200  | 0.54842900  | -0.72566000 |
| H | 5.67245500  | 1.47426300  | -2.14731800 |
| C | 7.11104000  | -0.29653300 | 0.38301400  |
| H | 6.01924700  | -1.52671800 | 1.77516600  |
| H | 7.88005800  | 1.00732400  | -1.15874900 |
| H | 8.08247500  | -0.50349200 | 0.82206100  |
| H | -0.20384900 | 0.77737000  | -0.35774000 |
| H | 0.87918200  | -0.03273500 | 4.41552400  |

TS1:

0 1

|   |             |             |             |
|---|-------------|-------------|-------------|
| P | 1.28912600  | -0.56594900 | -0.10849800 |
| N | 0.89409900  | -0.26431600 | 1.49514900  |
| N | 1.42221900  | -2.25548500 | -0.15293300 |
| N | 2.75516800  | 0.23293800  | -0.35651700 |
| C | -0.18051200 | -1.00966800 | 2.16537300  |
| H | -0.51611400 | -1.84262100 | 1.54821200  |
| H | 0.18420800  | -1.39992500 | 3.12482800  |
| H | -1.04170300 | -0.35900900 | 2.35197100  |
| C | 1.28606100  | 0.95907800  | 2.20073700  |
| H | 1.71819100  | 0.69506000  | 3.17537600  |
| H | 2.02347000  | 1.50977400  | 1.61919900  |
| H | 0.41647500  | 1.60550700  | 2.36676800  |
| C | 1.22783400  | -2.91839400 | -1.44402800 |
| H | 2.18365900  | -3.24969100 | -1.87541600 |
| H | 0.58184500  | -3.79682500 | -1.32100700 |
| H | 0.74602100  | -2.23775900 | -2.14935800 |
| C | 2.05220300  | -3.09636900 | 0.86801200  |
| H | 1.43011700  | -3.98112300 | 1.05623900  |
| H | 3.04768400  | -3.43873200 | 0.54859600  |
| H | 2.15462200  | -2.54442100 | 1.80305000  |
| C | 2.96044200  | 1.03868300  | -1.56742800 |
| H | 3.58543500  | 1.90401500  | -1.31602700 |
| H | 3.47059100  | 0.46292000  | -2.35377000 |
| H | 2.00193800  | 1.39949400  | -1.93610900 |
| C | 3.99051100  | -0.24889800 | 0.26529700  |
| H | 4.65716700  | 0.60249100  | 0.45096200  |
| H | 3.77961100  | -0.72464200 | 1.22528900  |
| H | 4.52435500  | -0.96661700 | -0.37514900 |
| C | -1.05223700 | 0.88240000  | -0.71368200 |
| C | -2.25071100 | 0.08671700  | -0.45742500 |
| C | -3.36910600 | 0.55819900  | 0.27667600  |
| C | -2.31719600 | -1.23863800 | -0.95410800 |
| C | -4.47243100 | -0.26268000 | 0.50488600  |
| H | -3.35941000 | 1.57358400  | 0.65053200  |
| C | -3.42399800 | -2.05248500 | -0.71591600 |
| H | -1.49744800 | -1.61332600 | -1.55520600 |
| C | -4.51313200 | -1.57482900 | 0.01926300  |
| H | -5.31394100 | 0.13113800  | 1.06961700  |
| H | -3.44104100 | -3.06210100 | -1.11971700 |



|   |             |             |             |
|---|-------------|-------------|-------------|
| H | -5.37891600 | -2.20563200 | 0.19944900  |
| C | -0.87994100 | 2.24687000  | -0.26395600 |
| O | -0.01695500 | 0.29452800  | -1.32410300 |
| O | -1.72884600 | 2.97700900  | 0.25101500  |
| O | 0.40116800  | 2.71978800  | -0.48950600 |
| C | 0.60267200  | 4.09420700  | -0.14490500 |
| H | -0.05193100 | 4.74378600  | -0.73306000 |
| H | 1.64888500  | 4.30445800  | -0.37577300 |
| H | 0.40324700  | 4.27171900  | 0.91606200  |

TS2 si face:

O 1

|   |             |             |             |
|---|-------------|-------------|-------------|
| P | 1.33389000  | -0.54609200 | -0.11439200 |
| N | 0.91178700  | -0.25541300 | 1.48470400  |
| N | 1.47047100  | -2.22993800 | -0.18009000 |
| N | 2.77745600  | 0.29953800  | -0.33638100 |
| C | -0.09810700 | -1.06313900 | 2.17804400  |
| H | -0.42339800 | -1.89428500 | 1.55325500  |
| H | 0.32200600  | -1.46425400 | 3.10921400  |
| H | -0.97275600 | -0.45035600 | 2.42382100  |
| C | 1.31831500  | 0.94137500  | 2.22623300  |
| H | 1.81669500  | 0.64482000  | 3.15837100  |
| H | 2.00431600  | 1.54073900  | 1.63076000  |
| H | 0.44258300  | 1.55022800  | 2.47986100  |
| C | 1.31292000  | -2.87420900 | -1.48825400 |
| H | 2.28507200  | -3.13693200 | -1.92785500 |
| H | 0.72295200  | -3.79212700 | -1.37972300 |
| H | 0.78911500  | -2.20913500 | -2.17808800 |
| C | 2.16280500  | -3.06024200 | 0.81403800  |
| H | 1.58885600  | -3.97903000 | 0.98546500  |
| H | 3.16828500  | -3.33865700 | 0.46955800  |
| H | 2.25173400  | -2.52799400 | 1.76142700  |
| C | 2.98641200  | 1.05963000  | -1.57603100 |
| H | 3.60421500  | 1.93707800  | -1.35265200 |
| H | 3.50370800  | 0.46027400  | -2.33883500 |
| H | 2.02768500  | 1.39965100  | -1.96456300 |
| C | 4.01796900  | -0.14832700 | 0.30936800  |
| H | 4.66203400  | 0.72119100  | 0.48532800  |
| H | 3.80420400  | -0.61094900 | 1.27464300  |
| H | 4.56922800  | -0.86629000 | -0.31372900 |
| C | -1.10697600 | 0.87819700  | -0.72037400 |
| C | -2.28582900 | 0.05072200  | -0.44198400 |
| C | -3.40873900 | 0.48398800  | 0.30799300  |
| C | -2.32013500 | -1.27401200 | -0.94470000 |
| C | -4.49132900 | -0.36604700 | 0.53853000  |
| H | -3.42122600 | 1.49199800  | 0.70037900  |
| C | -3.40386800 | -2.11843200 | -0.70523700 |
| H | -1.48690500 | -1.62857300 | -1.53955500 |
| C | -4.50248000 | -1.67399800 | 0.03938300  |
| H | -5.33590700 | -0.00047100 | 1.11750700  |
| H | -3.39292800 | -3.12766700 | -1.10941800 |
| H | -5.34923700 | -2.32933000 | 0.22212000  |
| C | -0.96872800 | 2.25304000  | -0.27191900 |
| O | -0.08681100 | 0.33458500  | -1.36215800 |
| O | -1.84494000 | 2.95869400  | 0.24721900  |
| O | 0.28356300  | 2.75808700  | -0.51056300 |
| C | 0.48914000  | 4.12636400  | -0.13119400 |
| H | -0.17768600 | 4.79002300  | -0.68852000 |
| H | 1.52839700  | 4.34423800  | -0.37949700 |
| H | 0.31987700  | 4.26749400  | 0.93961000  |

TS2 re face:

|     |             |             |             |
|-----|-------------|-------------|-------------|
| 0 1 |             |             |             |
| P   | -2.27686900 | -1.18202100 | -0.41238300 |
| N   | -1.05816200 | -1.31935700 | -1.50519100 |
| N   | -2.36288600 | -2.52091300 | 0.56500800  |
| N   | -3.68868000 | -1.01443800 | -1.27385400 |
| C   | -0.05173700 | -2.39141700 | -1.48416900 |
| H   | -0.22130200 | -3.07100000 | -0.65033500 |
| H   | -0.10358100 | -2.96148400 | -2.42097700 |
| H   | 0.94276300  | -1.94965800 | -1.38848500 |
| C   | -0.77967600 | -0.26725700 | -2.50434300 |
| H   | -0.75987500 | -0.71874400 | -3.50443700 |
| H   | -1.55065400 | 0.50221500  | -2.47699800 |
| H   | 0.18817100  | 0.19118200  | -2.28453400 |
| C   | -1.57393700 | -2.64859700 | 1.79931800  |
| H   | -2.18679800 | -3.16178200 | 2.54887000  |
| H   | -0.65815900 | -3.23188200 | 1.63549700  |
| H   | -1.31751300 | -1.66462700 | 2.18719500  |
| C   | -2.92837500 | -3.77748600 | 0.07123500  |
| H   | -2.14761700 | -4.49276200 | -0.22396700 |
| H   | -3.52929000 | -4.23529300 | 0.86525800  |
| H   | -3.57889400 | -3.59978400 | -0.78652100 |
| C   | -4.90932100 | -0.53516800 | -0.61456900 |
| H   | -5.37470100 | 0.24696200  | -1.22586200 |
| H   | -5.63093600 | -1.35361000 | -0.48708000 |
| H   | -4.67374600 | -0.11299500 | 0.36199700  |
| C   | -3.89645500 | -1.54367600 | -2.62077400 |
| H   | -4.26525900 | -0.74922000 | -3.28106100 |
| H   | -2.96324900 | -1.92876400 | -3.03107500 |
| H   | -4.63882400 | -2.35423800 | -2.61295600 |
| C   | -1.13064300 | 0.99947100  | 0.85516300  |
| C   | -1.17144700 | 2.19552800  | -0.03541900 |
| C   | -0.06619600 | 3.06763300  | -0.07576700 |
| C   | -2.28315000 | 2.51058700  | -0.83828900 |
| C   | -0.07730900 | 4.20341100  | -0.88374300 |
| H   | 0.80189500  | 2.85058000  | 0.53515400  |
| C   | -2.28749000 | 3.64386300  | -1.65732600 |
| H   | -3.15959700 | 1.87219700  | -0.81162500 |
| C   | -1.18477600 | 4.49929000  | -1.68605000 |
| H   | 0.79126300  | 4.85626700  | -0.89420600 |
| H   | -3.16311400 | 3.86236300  | -2.26397700 |
| H   | -1.18640400 | 5.38050000  | -2.32118300 |
| C   | -1.11158000 | 1.28893300  | 2.29473700  |
| O   | -2.25068300 | 0.06550600  | 0.54649900  |
| O   | -0.50150000 | 2.21796500  | 2.80474700  |
| O   | -1.76806400 | 0.35784400  | 3.06291700  |
| C   | -1.65480500 | 0.55971000  | 4.48020400  |
| H   | -2.22798500 | -0.24925600 | 4.93638300  |
| H   | -2.06937800 | 1.52915300  | 4.76792200  |
| C   | 2.30780900  | -0.19165000 | 0.21354300  |
| O   | 1.34618700  | -0.33624600 | 1.11365700  |
| O   | 2.14469900  | 0.10333600  | -0.97172700 |
| N   | 3.54510600  | -0.44882200 | 0.77964500  |
| H   | 3.50871400  | -0.64137600 | 1.77066300  |
| C   | 4.81808400  | -0.45471700 | 0.18433700  |
| C   | 5.04841300  | -0.12665900 | -1.16274800 |
| C   | 5.91019100  | -0.80447400 | 0.99987600  |
| C   | 6.35169400  | -0.15495200 | -1.66486300 |
| H   | 4.21272600  | 0.15008800  | -1.79036600 |
| C   | 7.20429800  | -0.82544100 | 0.48399400  |
| H   | 5.73992200  | -1.05789900 | 2.04403200  |
| C   | 7.43666100  | -0.50142100 | -0.85609900 |

|   |             |             |             |
|---|-------------|-------------|-------------|
| H | 6.51515500  | 0.10430300  | -2.70746800 |
| H | 8.03188700  | -1.09598500 | 1.13382900  |
| H | 8.44446200  | -0.51624700 | -1.25973700 |
| H | 0.35772500  | 0.19939500  | 0.82794500  |
| H | -0.60904200 | 0.51613000  | 4.79636600  |

TS3:

|     |             |             |             |
|-----|-------------|-------------|-------------|
| O 1 |             |             |             |
| P   | -3.05894800 | -0.52779300 | -0.09307400 |
| N   | -2.47874200 | -1.55692900 | -1.27059800 |
| N   | -3.69764400 | -1.56918000 | 1.06074400  |
| N   | -4.20258600 | 0.39378000  | -0.92790500 |
| C   | -1.72927200 | -2.77810800 | -0.92274100 |
| H   | -1.86680200 | -3.02592000 | 0.12837700  |
| H   | -2.08944700 | -3.60929800 | -1.54274300 |
| H   | -0.65953100 | -2.63351800 | -1.10689200 |
| C   | -2.17683700 | -1.08515800 | -2.63232200 |
| H   | -2.52164400 | -1.83376800 | -3.35722700 |
| H   | -2.68794900 | -0.14347300 | -2.83247900 |
| H   | -1.09661000 | -0.94927400 | -2.76169600 |
| C   | -3.63130600 | -1.24750600 | 2.48630000  |
| H   | -4.61642700 | -0.94695700 | 2.87340300  |
| H   | -3.29346300 | -2.12828000 | 3.04708000  |
| H   | -2.92288900 | -0.43724000 | 2.65069800  |
| C   | -4.62268700 | -2.65113100 | 0.73732400  |
| H   | -4.35665100 | -3.54796800 | 1.31197000  |
| H   | -5.66190900 | -2.38687700 | 0.98382900  |
| H   | -4.56806300 | -2.90386100 | -0.32229600 |
| C   | -4.48870200 | 1.75962200  | -0.47995700 |
| H   | -4.75684300 | 2.37202400  | -1.34927100 |
| H   | -5.32761400 | 1.79102400  | 0.23284500  |
| H   | -3.60516900 | 2.18603700  | -0.00698700 |
| C   | -5.31988800 | -0.23825000 | -1.62666300 |
| H   | -5.62102600 | 0.39273400  | -2.47167900 |
| H   | -5.02445300 | -1.21161800 | -2.02185600 |
| H   | -6.19772500 | -0.37242700 | -0.97559400 |
| C   | 0.00181200  | 0.50494600  | 0.29202300  |
| C   | 0.04697500  | 1.94021200  | 0.02375300  |
| C   | 0.10714600  | 2.32694000  | -1.33051800 |
| C   | 0.00513100  | 2.93575300  | 1.01590900  |
| C   | 0.13170300  | 3.67273600  | -1.68356600 |
| H   | 0.16475100  | 1.55689100  | -2.09394400 |
| C   | 0.02058900  | 4.28297400  | 0.65673300  |
| H   | -0.04452000 | 2.65216600  | 2.05845800  |
| C   | 0.08550200  | 4.65615100  | -0.68905800 |
| H   | 0.19139800  | 3.95646500  | -2.73013400 |
| H   | -0.01495600 | 5.04445500  | 1.43040000  |
| H   | 0.10367100  | 5.70762500  | -0.96185000 |
| C   | 0.17187300  | -0.23500700 | 1.59355400  |
| O   | -2.11637400 | 0.44738900  | 0.60279700  |
| O   | -0.04763800 | -1.42301200 | 1.70332700  |
| O   | 0.60720900  | 0.53969900  | 2.60177600  |
| C   | 0.90223000  | -0.15096800 | 3.83141900  |
| H   | 1.68356000  | -0.89547900 | 3.66327300  |
| H   | 0.00711600  | -0.64475000 | 4.21686400  |
| C   | 2.21179100  | -0.62816100 | -1.07777200 |
| O   | 1.29931100  | -0.96467600 | -1.86359300 |
| O   | 2.08237800  | 0.07576100  | 0.00052100  |
| N   | 3.50735500  | -1.04699500 | -1.39823200 |
| H   | 3.51805300  | -1.59881500 | -2.24467900 |
| C   | 4.74022900  | -0.87259400 | -0.75460700 |
| C   | 4.92440500  | -0.08931800 | 0.39918200  |
| C   | 5.85833400  | -1.52052300 | -1.31674600 |

|   |             |             |             |
|---|-------------|-------------|-------------|
| C | 6.19707300  | 0.02756300  | 0.96231300  |
| H | 4.07389800  | 0.41568300  | 0.83559600  |
| C | 7.12190000  | -1.39246900 | -0.74430600 |
| H | 5.72963900  | -2.12955000 | -2.20898100 |
| C | 7.30436200  | -0.61619100 | 0.40426100  |
| H | 6.31908300  | 0.63843700  | 1.85310900  |
| H | 7.96576900  | -1.90394900 | -1.19944900 |
| H | 8.28816400  | -0.51520700 | 0.85241200  |
| H | -0.14532600 | -0.15400400 | -0.54800900 |
| H | 1.24617900  | 0.62049100  | 4.51980300  |

PO(NMe<sub>2</sub>)<sub>3</sub>:

0 1

|   |             |             |             |
|---|-------------|-------------|-------------|
| P | 0.00001400  | -0.02518300 | -0.48675800 |
| N | -0.00025300 | 1.55403900  | 0.13223600  |
| N | -1.41925600 | -0.65510000 | 0.19025300  |
| N | 1.41947200  | -0.65465100 | 0.19027800  |
| C | -1.21458000 | 2.36037800  | -0.04638700 |
| H | -2.10362300 | 1.74373900  | 0.08606000  |
| H | -1.22534600 | 3.16079800  | 0.70288200  |
| H | -1.25564300 | 2.82050800  | -1.04488900 |
| C | 1.21381200  | 2.36078300  | -0.04633600 |
| H | 1.22427900  | 3.16120700  | 0.70293200  |
| H | 2.10305600  | 1.74444300  | 0.08614900  |
| H | 1.25476400  | 2.82092800  | -1.04483600 |
| C | -2.14849400 | -1.69015300 | -0.54281100 |
| H | -1.89783300 | -2.70153600 | -0.18537300 |
| H | -3.22775700 | -1.54086000 | -0.40774900 |
| H | -1.91224000 | -1.62018800 | -1.60459600 |
| C | -1.70515600 | -0.62597300 | 1.62021200  |
| H | -2.78554400 | -0.50464900 | 1.77528300  |
| H | -1.39725800 | -1.55353500 | 2.12831100  |
| H | -1.20022500 | 0.21703700  | 2.09469700  |
| C | 2.14908100  | -1.68943500 | -0.54279900 |
| H | 3.22828800  | -1.53981600 | -0.40764600 |
| H | 1.89870800  | -2.70092000 | -0.18544900 |
| H | 1.91288400  | -1.61947200 | -1.60459600 |
| C | 1.70528800  | -0.62550500 | 1.62025400  |
| H | 2.78562900  | -0.50385900 | 1.77538800  |
| H | 1.20007500  | 0.21733000  | 2.09475200  |
| H | 1.39764600  | -1.55318300 | 2.12829700  |
| O | 0.00006000  | -0.24010100 | -1.96880200 |

P(NC<sub>4</sub>H<sub>8</sub>)<sub>3</sub>:

0 1

|   |             |             |             |
|---|-------------|-------------|-------------|
| P | -0.00045800 | -0.00166700 | -0.93676000 |
| C | 1.62859800  | -1.24231200 | 1.04759000  |
| C | 2.73721700  | -0.43599000 | -0.95227500 |
| C | 3.10034500  | -1.70779000 | 1.04211400  |
| H | 0.93308500  | -2.09273900 | 1.03334400  |
| H | 1.40035700  | -0.65148500 | 1.94643300  |
| C | 3.49266300  | -1.67190000 | -0.44493400 |
| H | 3.32637700  | 0.47646000  | -0.75760500 |
| H | 2.52874500  | -0.46559900 | -2.02812500 |
| H | 3.72140300  | -1.00133100 | 1.60596400  |
| H | 3.22418400  | -2.69440600 | 1.49969300  |
| H | 4.57414200  | -1.60787500 | -0.60282300 |
| H | 3.12472300  | -2.56868000 | -0.95804400 |
| C | -1.88193700 | -0.79388600 | 1.05400400  |
| C | -1.75553500 | -2.14687100 | -0.95415700 |
| C | -3.02779400 | -1.82809000 | 1.04787300  |

|   |             |             |             |
|---|-------------|-------------|-------------|
| H | -2.26388100 | 0.23623500  | 1.04672500  |
| H | -1.25349600 | -0.90056500 | 1.94991400  |
| C | -3.20133200 | -2.17692600 | -0.44033700 |
| H | -1.26528900 | -3.11767300 | -0.76813100 |
| H | -1.68084100 | -1.94510700 | -2.02908200 |
| H | -2.72972800 | -2.72401600 | 1.60572600  |
| H | -3.93971500 | -1.43859900 | 1.51135200  |
| H | -3.69317000 | -3.14174100 | -0.60099800 |
| H | -3.79190200 | -1.40381400 | -0.94671700 |
| C | 0.27045700  | 2.03016800  | 1.04626900  |
| C | -0.99747700 | 2.58500000  | -0.94447000 |
| C | -0.06300400 | 3.53733800  | 1.04233800  |
| H | 1.35462600  | 1.85349400  | 1.02439700  |
| H | -0.12021900 | 1.53802700  | 1.94862600  |
| C | -0.30275500 | 3.85834800  | -0.44294700 |
| H | -2.08094100 | 2.63761200  | -0.74227800 |
| H | -0.87504500 | 2.41891600  | -2.02115900 |
| H | -0.98074700 | 3.72193400  | 1.61365800  |
| H | 0.73286300  | 4.13881400  | 1.49287000  |
| H | -0.90149300 | 4.76203700  | -0.59617500 |
| H | 0.65345100  | 3.98951900  | -0.96382500 |
| N | 1.48492700  | -0.44929200 | -0.18360300 |
| N | -1.13009500 | -1.06418000 | -0.18189500 |
| N | -0.35301900 | 1.50819400  | -0.18003800 |

TS1 when the PR is P(NC<sub>4</sub>H<sub>8</sub>)<sub>3</sub>:

|     |             |             |             |
|-----|-------------|-------------|-------------|
| 0 1 |             |             |             |
| P   | 0.84709800  | -0.29136200 | 0.01732800  |
| C   | 3.01085600  | -1.66674800 | -1.04371500 |
| C   | 1.16167300  | -1.25321700 | -2.59877200 |
| C   | 3.49842400  | -1.84343700 | -2.48886800 |
| H   | 2.99318600  | -2.63281100 | -0.51747600 |
| H   | 3.63839400  | -0.98143800 | -0.46484100 |
| C   | 2.20470900  | -2.17403000 | -3.24884100 |
| H   | 1.13020800  | -0.27299100 | -3.08509500 |
| H   | 0.15372100  | -1.67306400 | -2.63682900 |
| H   | 3.92428400  | -0.90336900 | -2.85865700 |
| H   | 4.26439100  | -2.61959000 | -2.57632300 |
| H   | 2.28184000  | -2.00668700 | -4.32693100 |
| H   | 1.93511200  | -3.22514000 | -3.09000100 |
| C   | 0.16117600  | -2.84452700 | 0.87334400  |
| C   | -0.42547200 | -1.01823500 | 2.35551900  |
| C   | -0.77312000 | -3.35290900 | 1.99339600  |
| H   | 1.10271600  | -3.40487900 | 0.83795600  |
| H   | -0.31822800 | -2.93224300 | -0.10801100 |
| C   | -0.61151800 | -2.32577000 | 3.12694600  |
| H   | -1.39572000 | -0.64730500 | 1.99689000  |
| H   | 0.05014700  | -0.22901200 | 2.94382200  |
| H   | -1.80891300 | -3.35066200 | 1.63965200  |
| H   | -0.52448200 | -4.37307300 | 2.29978700  |
| H   | -1.47467900 | -2.29140900 | 3.79786700  |
| H   | 0.28145500  | -2.54106200 | 3.72553600  |
| C   | 2.69788200  | 0.36863100  | 2.07518300  |
| C   | 2.48929900  | 1.89792800  | 0.17205100  |
| C   | 3.84789800  | 1.39018700  | 2.08240300  |
| H   | 3.04736300  | -0.66796600 | 2.08569600  |
| H   | 2.05369100  | 0.50938800  | 2.95217700  |
| C   | 3.27814400  | 2.58058500  | 1.29402100  |
| H   | 1.67320400  | 2.50050900  | -0.22906600 |
| H   | 3.16202000  | 1.62508600  | -0.65688600 |
| H   | 4.15800600  | 1.64886900  | 3.09937100  |
| H   | 4.72152500  | 0.98025800  | 1.56113800  |
| H   | 2.59979400  | 3.16654400  | 1.92533800  |

|   |             |             |             |
|---|-------------|-------------|-------------|
| H | 4.05106900  | 3.25322100  | 0.91093000  |
| N | 1.64315200  | -1.12378800 | -1.19630600 |
| N | 0.45084400  | -1.42947500 | 1.22852300  |
| N | 1.95364200  | 0.68051400  | 0.82784200  |
| C | -1.56204000 | 1.23680900  | -0.80168600 |
| C | -2.70505400 | 0.35609400  | -0.58217700 |
| C | -2.61264200 | -1.00566800 | -0.96787200 |
| C | -3.91845300 | 0.76769700  | 0.03019700  |
| C | -3.66106000 | -1.90124600 | -0.75483100 |
| H | -1.71991700 | -1.34334300 | -1.48098600 |
| C | -4.95852600 | -0.13493900 | 0.23975800  |
| H | -4.02995900 | 1.80353600  | 0.32192100  |
| C | -4.84552300 | -1.47659200 | -0.14676800 |
| H | -3.55731600 | -2.93303600 | -1.08321100 |
| H | -5.87370000 | 0.21642000  | 0.70999400  |
| H | -5.66645000 | -2.17013900 | 0.01166300  |
| C | -1.59238400 | 2.65781700  | -0.52285100 |
| O | -0.41237300 | 0.68437600  | -1.18314300 |
| O | -2.58611000 | 3.33724600  | -0.25887300 |
| O | -0.35122600 | 3.25814700  | -0.62763500 |
| C | -0.35973600 | 4.67916700  | -0.45190500 |
| H | -0.74020900 | 4.95407700  | 0.53617900  |
| H | -0.98194400 | 5.16212300  | -1.21068100 |
| H | 0.67992700  | 4.99512500  | -0.56124100 |

PO(NC<sub>4</sub>H<sub>8</sub>)<sub>3</sub>:

|     |             |             |             |
|-----|-------------|-------------|-------------|
| O 1 |             |             |             |
| P   | -0.01169800 | -0.14314900 | 0.65678200  |
| C   | 1.85044600  | 0.31622100  | -1.37743300 |
| C   | 2.72783000  | -0.58866700 | 0.71531900  |
| C   | 3.34949500  | 0.00059400  | -1.53071000 |
| H   | 1.67066900  | 1.39911200  | -1.45335700 |
| H   | 1.24344200  | -0.17388800 | -2.14993100 |
| C   | 3.87015400  | 0.05118200  | -0.08482300 |
| H   | 2.83096800  | -1.68490400 | 0.72702300  |
| H   | 2.67319200  | -0.25122400 | 1.75221000  |
| H   | 3.48018800  | -1.00865500 | -1.93938200 |
| H   | 3.85438400  | 0.70130300  | -2.20260700 |
| H   | 4.82067700  | -0.47422700 | 0.04873100  |
| H   | 4.01174400  | 1.09228500  | 0.22998600  |
| C   | -1.42924400 | 1.68732800  | -0.96784900 |
| C   | -0.65756700 | 2.45441800  | 1.22017100  |
| C   | -1.54036000 | 3.21963800  | -0.87603800 |
| H   | -2.42513400 | 1.23179200  | -1.05375400 |
| H   | -0.84787800 | 1.36522900  | -1.83760100 |
| C   | -1.63793300 | 3.47886000  | 0.63596900  |
| H   | 0.36859600  | 2.85465200  | 1.21313800  |
| H   | -0.89229600 | 2.15780100  | 2.24508200  |
| H   | -0.63330200 | 3.68850200  | -1.27679200 |
| H   | -2.39364800 | 3.60659400  | -1.44148300 |
| H   | -1.38629100 | 4.50607900  | 0.91637000  |
| H   | -2.65422300 | 3.26993500  | 0.99125200  |
| C   | -0.26404400 | -2.53229400 | -0.65096500 |
| C   | -2.33449100 | -1.45353700 | 0.04139800  |
| C   | -1.45327800 | -3.45881600 | -0.93821100 |
| H   | 0.34145200  | -2.93848400 | 0.17135000  |
| H   | 0.38997200  | -2.40580200 | -1.51971900 |
| C   | -2.50749500 | -2.97921000 | 0.06983500  |
| H   | -2.95982700 | -1.00767300 | -0.74426500 |
| H   | -2.60276400 | -0.98688400 | 0.99367600  |
| H   | -1.81265100 | -3.30786900 | -1.96364100 |
| H   | -1.18983300 | -4.51484400 | -0.82552200 |
| H   | -3.52588300 | -3.28989000 | -0.18360100 |

|   |             |             |             |
|---|-------------|-------------|-------------|
| H | -2.27377000 | -3.36354600 | 1.06944100  |
| N | 1.52043500  | -0.17782100 | -0.03062900 |
| N | -0.78994400 | 1.29931500  | 0.30696700  |
| N | -0.89586900 | -1.24043300 | -0.27707800 |
| O | 0.08882700  | -0.38029400 | 2.13394700  |

P(NMe<sub>2</sub>)<sub>2</sub>Et:

|     |             |             |             |
|-----|-------------|-------------|-------------|
| 0 1 |             |             |             |
| P   | -0.01337700 | -0.01569900 | -0.87585900 |
| N   | 1.12657900  | -0.79107600 | 0.24703600  |
| N   | -1.46175800 | -0.19243500 | 0.02358800  |
| C   | 2.53886200  | -0.57441800 | -0.07524300 |
| H   | 2.77617200  | 0.49090300  | -0.10243200 |
| H   | 3.15588000  | -1.02951700 | 0.70827500  |
| H   | 2.84062100  | -1.02172500 | -1.04056500 |
| C   | 0.85760300  | -2.22232300 | 0.41825400  |
| H   | 1.47098200  | -2.60538100 | 1.24249200  |
| H   | -0.19281500 | -2.37925700 | 0.67313200  |
| H   | 1.08693800  | -2.81738500 | -0.48448000 |
| C   | 0.73739900  | 2.40155600  | 0.70233500  |
| H   | 1.16661100  | 3.40615600  | 0.60716600  |
| H   | -0.20486300 | 2.49923900  | 1.24757000  |
| H   | 1.41509800  | 1.80302000  | 1.31815100  |
| C   | -2.69938300 | -0.49233700 | -0.68158800 |
| H   | -3.21603100 | -1.34504200 | -0.21502900 |
| H   | -3.39520100 | 0.36218800  | -0.67703900 |
| H   | -2.48249100 | -0.74906400 | -1.72177300 |
| C   | -1.62712700 | 0.08506200  | 1.44413200  |
| H   | -2.18887300 | -0.73071700 | 1.92315000  |
| H   | -0.65054600 | 0.15104800  | 1.92611400  |
| H   | -2.18217200 | 1.01986800  | 1.62381000  |
| C   | 0.52197400  | 1.77791100  | -0.68407300 |
| H   | -0.25549200 | 2.32835800  | -1.23068800 |
| H   | 1.42713500  | 1.88466700  | -1.29723000 |

TS1 when the PR is P(NMe<sub>2</sub>)<sub>2</sub>Et:

|     |             |             |             |
|-----|-------------|-------------|-------------|
| 0 1 |             |             |             |
| C   | -1.19042600 | 0.77486300  | -0.64724600 |
| C   | -2.30121500 | -0.11252600 | -0.30073000 |
| C   | -3.46312300 | 0.32107500  | 0.38617200  |
| C   | -2.23917000 | -1.48196100 | -0.66062100 |
| C   | -4.48454200 | -0.57352700 | 0.70166900  |
| H   | -3.55410800 | 1.36590800  | 0.65315900  |
| C   | -3.26370100 | -2.36966900 | -0.33525700 |
| H   | -1.38386100 | -1.84087300 | -1.22187900 |
| C   | -4.39774800 | -1.92590000 | 0.35219400  |
| H   | -5.36189800 | -0.20630300 | 1.22834700  |
| H   | -3.18146000 | -3.41211400 | -0.63379900 |
| H   | -5.20005900 | -2.61506600 | 0.59939500  |
| C   | -1.17761100 | 2.19432700  | -0.36219100 |
| O   | -0.08371100 | 0.24820600  | -1.17496000 |
| O   | -2.13243900 | 2.90143100  | -0.03888700 |
| O   | 0.08853500  | 2.74174800  | -0.49012000 |
| C   | 0.13719900  | 4.16495000  | -0.33309400 |
| H   | -0.20568200 | 4.46792800  | 0.66050600  |
| H   | -0.48912500 | 4.65916500  | -1.08120600 |
| H   | 1.18359500  | 4.44184800  | -0.47725700 |
| P   | 1.36761500  | -0.43783900 | 0.01393500  |
| N   | 2.77252600  | 0.43691700  | 0.47989100  |
| N   | 1.98904100  | -1.76722700 | -0.79994900 |
| C   | 2.64577900  | 1.48262400  | 1.50440500  |
| H   | 2.06564600  | 1.12833400  | 2.35665900  |
| H   | 3.64881000  | 1.73601200  | 1.86416200  |
| H   | 2.16946100  | 2.38915200  | 1.10792100  |
| C   | 3.65423200  | 0.86307900  | -0.61776900 |

|   |             |             |             |
|---|-------------|-------------|-------------|
| H | 4.65375900  | 1.05281900  | -0.21184800 |
| H | 3.73142700  | 0.07627800  | -1.36991600 |
| H | 3.28949500  | 1.77891200  | -1.10340400 |
| C | 1.40799600  | -1.65600200 | 2.65775200  |
| H | 0.79915700  | -1.84716300 | 3.54789400  |
| H | 1.75447800  | -2.62322400 | 2.28368700  |
| H | 2.28456500  | -1.08125500 | 2.96933400  |
| C | 1.46441500  | -2.18745200 | -2.10399000 |
| H | 2.25995500  | -2.14499200 | -2.86081400 |
| H | 1.09513100  | -3.22021600 | -2.05265800 |
| H | 0.65122800  | -1.53356300 | -2.41494200 |
| C | 3.12483600  | -2.56267800 | -0.32501700 |
| H | 3.91956200  | -2.58009200 | -1.08382100 |
| H | 3.53783700  | -2.13610300 | 0.58931100  |
| H | 2.81699500  | -3.59918400 | -0.13096600 |
| C | 0.56088600  | -0.92213300 | 1.60700600  |
| H | -0.27880700 | -1.54543900 | 1.28379200  |
| H | 0.10277300  | -0.01651400 | 2.02178700  |

PO(NMe<sub>2</sub>)<sub>2</sub>Et:

0 1

|   |             |             |             |
|---|-------------|-------------|-------------|
| P | -0.00350700 | 0.01654000  | 0.60795400  |
| N | -1.17586400 | -0.71144400 | -0.39791100 |
| N | 1.41774300  | -0.24400500 | -0.26680200 |
| C | -2.58677300 | -0.39911800 | -0.14143300 |
| H | -2.73600500 | 0.67438900  | -0.01775500 |
| H | -3.18137000 | -0.71900800 | -1.00453100 |
| H | -2.97423000 | -0.91067900 | 0.75289300  |
| C | -0.98771600 | -2.14330500 | -0.67412500 |
| H | -1.55513000 | -2.41021300 | -1.57322100 |
| H | 0.06709200  | -2.35774100 | -0.85217300 |
| H | -1.33372600 | -2.77331000 | 0.15848700  |
| C | -0.57016700 | 2.54949400  | -0.71547600 |
| H | -0.85020300 | 3.59394800  | -0.54044600 |
| H | 0.36945400  | 2.55217400  | -1.27440900 |
| H | -1.33597900 | 2.10044600  | -1.35535500 |
| C | 2.67208200  | -0.47374800 | 0.44619900  |
| H | 3.19249100  | -1.34078200 | 0.01650400  |
| H | 3.34330500  | 0.39589600  | 0.37386200  |
| H | 2.46266000  | -0.67851400 | 1.49660000  |
| C | 1.56023100  | -0.01716800 | -1.69923300 |
| H | 2.07221900  | -0.87132300 | -2.16496700 |
| H | 0.58013800  | 0.08780400  | -2.16626500 |
| H | 2.15472400  | 0.88414000  | -1.91426600 |
| C | -0.42924000 | 1.80852900  | 0.62106300  |
| H | 0.37664300  | 2.24835100  | 1.22091000  |
| H | -1.33376700 | 1.91429600  | 1.23068800  |
| O | 0.13633000  | -0.48724200 | 2.01564300  |

P(NEt)<sub>3</sub>:

0 1

|   |             |             |             |
|---|-------------|-------------|-------------|
| P | 0.10379800  | 0.17323900  | -0.35177400 |
| N | -0.47714800 | 1.46414000  | 0.68714700  |
| N | -0.85509600 | -1.05320500 | 0.37722100  |
| N | 1.69301500  | 0.22488100  | 0.32391900  |
| H | 1.73670700  | 0.24868000  | 1.34162800  |
| H | 0.19323800  | 2.22888400  | 0.66834700  |
| H | -0.91499800 | -1.04828400 | 1.39346700  |
| C | -1.85255600 | 1.95509400  | 0.52047900  |
| H | -2.51391800 | 1.08293000  | 0.52872000  |
| H | -2.10201500 | 2.54444800  | 1.41236000  |
| C | -2.10719300 | 2.79538900  | -0.73837500 |



|   |             |             |             |
|---|-------------|-------------|-------------|
| H | -1.90373800 | 2.21893800  | -1.64691900 |
| H | -3.14992800 | 3.13326900  | -0.77410300 |
| H | -1.46641900 | 3.68544000  | -0.75451600 |
| C | -1.05646000 | -2.36086800 | -0.24393800 |
| H | -0.89840700 | -2.23809400 | -1.32180500 |
| H | -0.30924500 | -3.09423100 | 0.10002600  |
| C | -2.46131800 | -2.91185700 | 0.01246900  |
| H | -2.64691500 | -3.03375000 | 1.08634600  |
| H | -3.22221400 | -2.23323100 | -0.38608900 |
| H | -2.58494400 | -3.89331200 | -0.46000600 |
| C | 2.79407200  | -0.51877300 | -0.29132500 |
| H | 2.81832600  | -1.56874300 | 0.04412300  |
| H | 2.61272100  | -0.54025000 | -1.37201400 |
| C | 4.14839800  | 0.13445300  | -0.00880600 |
| H | 4.35049500  | 0.17374600  | 1.06831400  |
| H | 4.95840300  | -0.43528700 | -0.47860400 |
| H | 4.17082800  | 1.15892500  | -0.39369900 |

TS1 when the PR is P(NEt)<sub>3</sub>:

0 1

|   |             |             |             |
|---|-------------|-------------|-------------|
| P | -1.03548900 | 0.45125200  | -0.50875000 |
| N | -0.66908300 | 0.33431200  | 1.12660200  |
| N | -1.96871800 | 1.89171400  | -0.61192000 |
| N | -2.13620400 | -0.64592400 | -1.10005200 |
| C | 1.47840400  | -0.87014000 | -0.62755600 |
| C | 2.61491200  | 0.00762000  | -0.36461700 |
| C | 3.71611600  | -0.34483900 | 0.45734200  |
| C | 2.61342100  | 1.30437800  | -0.93759300 |
| C | 4.74531200  | 0.56291000  | 0.69243200  |
| H | 3.74792100  | -1.33365900 | 0.89618100  |
| C | 3.64872500  | 2.20587800  | -0.68833900 |
| H | 1.80496600  | 1.58041600  | -1.60482900 |
| C | 4.72276700  | 1.84539600  | 0.12871500  |
| H | 5.57832500  | 0.26481600  | 1.32404300  |
| H | 3.62062700  | 3.19112000  | -1.14721300 |
| H | 5.53296700  | 2.54431300  | 0.31589300  |
| C | 1.31413600  | -2.19479400 | -0.05564900 |
| O | 0.48988000  | -0.39780900 | -1.38266800 |
| O | 2.15034900  | -2.84085200 | 0.57359600  |
| O | 0.06574000  | -2.73395900 | -0.32289300 |
| C | -0.12171400 | -4.07245400 | 0.15460400  |
| H | 0.57907300  | -4.75884600 | -0.32866700 |
| H | -1.14866900 | -4.33620600 | -0.10485100 |
| H | 0.02473600  | -4.12954500 | 1.23681500  |
| H | -1.67835400 | -1.49708700 | -1.41312700 |
| H | -2.33064400 | 2.01782100  | -1.55548600 |
| H | 0.31497100  | 0.10375800  | 1.25077000  |
| C | -1.46079000 | 3.15807000  | -0.05217700 |
| H | -1.09263300 | 2.94255700  | 0.95313000  |
| H | -0.60855400 | 3.53823700  | -0.63379900 |
| C | -2.57053500 | 4.20673000  | -0.00500500 |
| H | -2.18451200 | 5.14339300  | 0.41066900  |
| H | -2.95841700 | 4.42494400  | -1.00721200 |
| H | -3.40506800 | 3.86903800  | 0.61721900  |
| C | -1.54005300 | -0.27508000 | 2.15397400  |
| H | -0.88566100 | -0.76226500 | 2.88411900  |
| H | -2.15032900 | -1.06781500 | 1.70341900  |
| C | -2.43413700 | 0.74746000  | 2.85598000  |
| H | -3.05503800 | 0.25229200  | 3.61131400  |
| H | -1.83199900 | 1.51341000  | 3.35483000  |
| H | -3.09904500 | 1.24648400  | 2.14379000  |
| C | -3.60378200 | -0.63135500 | -1.11914400 |
| H | -3.95729800 | -0.45357100 | -2.14482800 |
| H | -3.94484400 | 0.21276400  | -0.51456300 |
| C | -4.20367000 | -1.93925800 | -0.60039600 |
| H | -5.29662800 | -1.90552000 | -0.66603600 |

|   |             |             |             |
|---|-------------|-------------|-------------|
| H | -3.86169300 | -2.79364000 | -1.19538200 |
| H | -3.92625700 | -2.11887300 | 0.44294600  |

PO(NEt)<sub>3</sub>:

|     |             |             |             |
|-----|-------------|-------------|-------------|
| O 1 |             |             |             |
| P   | 0.05390800  | -0.18455900 | 0.75815700  |
| N   | 1.47953400  | -0.72323700 | 0.03329300  |
| N   | -0.88434200 | -1.58290700 | 0.64072500  |
| N   | -0.36820600 | 1.03453500  | -0.32440200 |
| O   | 0.02660600  | 0.31441500  | 2.16782800  |
| H   | -1.47602600 | -1.70901200 | 1.45430500  |
| H   | -0.29599400 | 0.80366200  | -1.30920300 |
| H   | 1.70187900  | -1.66707900 | 0.33689900  |
| C   | 2.67107900  | 0.13870000  | -0.06337200 |
| H   | 3.15580500  | 0.25278900  | 0.91652300  |
| H   | 2.33347600  | 1.13212000  | -0.37054800 |
| C   | 3.66699600  | -0.41821000 | -1.07935500 |
| H   | 3.21397200  | -0.48883400 | -2.07361300 |
| H   | 4.54916500  | 0.22791900  | -1.14312100 |
| H   | 4.00985600  | -1.41942600 | -0.79182800 |
| C   | -1.37071400 | -2.20115000 | -0.59479700 |
| H   | -0.63995100 | -1.98831400 | -1.38194400 |
| H   | -1.36837400 | -3.29100600 | -0.46232800 |
| C   | -2.76790700 | -1.74102600 | -1.02684800 |
| H   | -3.50966100 | -1.96411100 | -0.25137200 |
| H   | -2.79018400 | -0.66227100 | -1.21194500 |
| H   | -3.07770400 | -2.25534800 | -1.94417000 |
| C   | -1.37057700 | 2.05470900  | 0.00320900  |
| H   | -1.31910600 | 2.21410000  | 1.08333400  |
| H   | -2.38941100 | 1.70417700  | -0.22633200 |
| C   | -1.09769000 | 3.36269100  | -0.73919300 |
| H   | -1.85749900 | 4.11029200  | -0.48633000 |
| H   | -0.11435300 | 3.76184500  | -0.47203400 |
| H   | -1.12339300 | 3.21854200  | -1.82644200 |

P(NMe<sub>2</sub>)Et<sub>2</sub>:

|     |             |             |             |
|-----|-------------|-------------|-------------|
| O 1 |             |             |             |
| P   | 0.10919800  | 0.19032900  | -0.86057200 |
| N   | -1.20437200 | -0.40481000 | 0.09963700  |
| C   | -0.19980200 | 2.78794800  | 0.23489900  |
| H   | -1.16101500 | 2.50863600  | 0.67808700  |
| H   | 0.22140900  | 3.60646300  | 0.82970500  |
| H   | -0.39838100 | 3.17008300  | -0.77221600 |
| C   | -2.29531200 | -1.06174700 | -0.61312100 |
| H   | -2.16789600 | -2.15705000 | -0.67302300 |
| H   | -3.24873100 | -0.86706500 | -0.10239900 |
| H   | -2.36399200 | -0.66885900 | -1.63043500 |
| C   | -1.10365700 | -0.83161000 | 1.48906400  |
| H   | -2.06063900 | -0.65700100 | 2.00018900  |
| H   | -0.86637300 | -1.90490400 | 1.58997800  |
| H   | -0.33729200 | -0.26165900 | 2.01836600  |
| C   | 2.25616400  | -1.30013500 | 0.60428900  |
| H   | 3.07982700  | -2.01056000 | 0.46276700  |
| H   | 2.68784200  | -0.38447400 | 1.02125600  |
| H   | 1.58520700  | -1.72520300 | 1.35569300  |
| C   | 1.53816400  | -1.04005000 | -0.72892600 |
| H   | 2.26491100  | -0.68598400 | -1.47415200 |
| H   | 1.14368700  | -1.98058700 | -1.13536300 |
| C   | 0.75646400  | 1.58889900  | 0.19520600  |
| H   | 1.71246600  | 1.88221400  | -0.25919100 |
| H   | 0.98947800  | 1.25484100  | 1.21338400  |

TS1 when the PR is P(NMe<sub>2</sub>)Et<sub>2</sub>:

|     |             |             |             |
|-----|-------------|-------------|-------------|
| 0 1 |             |             |             |
| C   | -0.88904600 | 0.76886700  | -0.73270300 |
| C   | -2.07078300 | -0.05984100 | -0.52993400 |
| C   | -3.23584100 | 0.36610200  | 0.15976200  |
| C   | -2.05199400 | -1.39368300 | -1.01245100 |
| C   | -4.30227600 | -0.50592300 | 0.36220400  |
| H   | -3.28520700 | 1.38402200  | 0.52397800  |
| C   | -3.12660900 | -2.25902400 | -0.79861000 |
| H   | -1.19943500 | -1.72737200 | -1.59295500 |
| C   | -4.25996200 | -1.82621100 | -0.10651800 |
| H   | -5.18173500 | -0.14960200 | 0.89287900  |
| H   | -3.08201400 | -3.27258100 | -1.19017600 |
| H   | -5.09985500 | -2.49631900 | 0.05327800  |
| C   | -0.74535600 | 2.11442700  | -0.21535800 |
| O   | 0.16463100  | 0.20465000  | -1.32163800 |
| O   | -1.63070200 | 2.82215400  | 0.26609400  |
| O   | 0.54528100  | 2.60620000  | -0.34486300 |
| C   | 0.69646600  | 3.98408700  | 0.01602800  |
| H   | 1.75020300  | 4.21825200  | -0.14913200 |
| H   | 0.42713800  | 4.15380200  | 1.06263500  |
| H   | 0.06719500  | 4.62189000  | -0.61114200 |
| P   | 1.44698700  | -0.68151400 | -0.12634700 |
| N   | 1.08698100  | -0.33359900 | 1.47907700  |
| C   | 3.35290300  | -0.01706500 | -2.05267300 |
| H   | 2.52643200  | 0.17829300  | -2.74118400 |
| H   | 4.18716900  | 0.63231100  | -2.33498800 |
| H   | 3.68239500  | -1.05225100 | -2.18798400 |
| C   | 0.03485900  | -1.09022500 | 2.16800800  |
| H   | 0.45248100  | -1.63245200 | 3.02734200  |
| H   | -0.74855500 | -0.41139400 | 2.52337000  |
| H   | -0.44117900 | -1.80335100 | 1.49250300  |
| C   | 1.59369900  | 0.80349500  | 2.24697900  |
| H   | 0.78390000  | 1.50495400  | 2.48132400  |
| H   | 2.03243200  | 0.44580800  | 3.18881500  |
| H   | 2.36099600  | 1.34486400  | 1.69638500  |
| C   | 3.22150300  | -2.86737300 | 0.58394900  |
| H   | 3.39207800  | -3.94847000 | 0.51947800  |
| H   | 4.10988700  | -2.37021900 | 0.18325500  |
| H   | 3.13237400  | -2.60444100 | 1.64222100  |
| C   | 1.95201200  | -2.48727100 | -0.19275600 |
| H   | 2.04764500  | -2.72632200 | -1.25827300 |
| H   | 1.08786000  | -3.05396200 | 0.16750200  |
| C   | 2.93784200  | 0.27852100  | -0.60034600 |
| H   | 3.75987900  | 0.07720900  | 0.09577300  |
| H   | 2.64605100  | 1.32790900  | -0.51347000 |

PO(NMe<sub>2</sub>)Et<sub>2</sub>:

|     |             |             |             |
|-----|-------------|-------------|-------------|
| 0 1 |             |             |             |
| P   | -0.07359900 | -0.27688200 | 0.54683000  |
| N   | -0.10971200 | 1.23612300  | -0.22788500 |
| C   | -2.46452000 | -1.08154800 | -0.70468800 |
| H   | -2.60881400 | -0.10524800 | -1.17738600 |
| H   | -2.97917900 | -1.83313400 | -1.31228500 |
| H   | -2.93908500 | -1.04976800 | 0.27979300  |
| C   | -0.09590800 | 2.44423600  | 0.59537100  |
| H   | 0.90070000  | 2.91321600  | 0.62148700  |
| H   | -0.80543600 | 3.17600600  | 0.18706500  |
| H   | -0.40198900 | 2.19434200  | 1.61219100  |
| C   | 0.21503600  | 1.46209600  | -1.62894300 |
| H   | -0.49989300 | 2.17169600  | -2.06768500 |
| H   | 1.22486100  | 1.88206900  | -1.76101900 |
| H   | 0.15693300  | 0.53549600  | -2.20326200 |
| C   | 2.45343400  | -1.07312700 | -0.66271400 |
| H   | 3.44867800  | -1.47890500 | -0.45231300 |
| H   | 1.96491400  | -1.76029600 | -1.36180300 |
| H   | 2.59320300  | -0.11577500 | -1.17331200 |

|   |             |             |             |
|---|-------------|-------------|-------------|
| C | 1.65740800  | -0.91548300 | 0.64068800  |
| H | 1.58251800  | -1.87510300 | 1.16742000  |
| H | 2.17006800  | -0.23251800 | 1.32890000  |
| C | -0.97373000 | -1.42383800 | -0.57561900 |
| H | -0.84638500 | -2.41547500 | -0.12339200 |
| H | -0.49040900 | -1.46566300 | -1.55818900 |
| O | -0.66863000 | -0.18932300 | 1.92524600  |

P(Et)<sub>3</sub>:

|     |             |             |             |
|-----|-------------|-------------|-------------|
| 0 1 |             |             |             |
| P   | 0.06129500  | -0.39333000 | -0.91075000 |
| C   | 2.56992800  | -0.76485400 | 0.37331100  |
| H   | 2.83170100  | 0.29341100  | 0.26187300  |
| H   | 3.13209800  | -1.15273400 | 1.23051100  |
| H   | 2.92026800  | -1.28623500 | -0.52378300 |
| C   | 0.15891200  | 2.16122700  | 0.62781100  |
| H   | 0.16653300  | 3.25228800  | 0.51568900  |
| H   | -0.68293000 | 1.90265100  | 1.27510400  |
| H   | 1.07777000  | 1.88502000  | 1.15491500  |
| C   | 1.05920100  | -0.95842300 | 0.57302300  |
| H   | 0.83993000  | -2.02738700 | 0.69141200  |
| H   | 0.73231100  | -0.46590000 | 1.49605200  |
| C   | -1.68180600 | -0.88933200 | -0.41138200 |
| H   | -1.68094600 | -1.98537700 | -0.48277100 |
| H   | -2.32550700 | -0.54901800 | -1.23291000 |
| C   | 0.07121500  | 1.48772900  | -0.74984100 |
| H   | 0.91279100  | 1.82442500  | -1.36741900 |
| H   | -0.82834400 | 1.82602100  | -1.28142400 |
| C   | -2.28659500 | -0.46147200 | 0.93379500  |
| H   | -2.43348900 | 0.62116700  | 0.98727100  |
| H   | -3.26826300 | -0.92965800 | 1.07654200  |
| H   | -1.65847700 | -0.75796600 | 1.77987900  |

TS1 when the PR is P(Et)<sub>3</sub>:

|     |             |             |             |
|-----|-------------|-------------|-------------|
| 0 1 |             |             |             |
| P   | 1.57904000  | -0.56142200 | 0.01852200  |
| C   | 0.29208600  | -1.59180300 | 2.35529900  |
| H   | 0.94528100  | -2.46323300 | 2.46302000  |
| H   | -0.08428400 | -1.33570900 | 3.35031400  |
| H   | -0.56789700 | -1.87401600 | 1.74124000  |
| C   | 3.39614800  | -2.78547300 | 0.40019500  |
| H   | 3.59958100  | -3.83045600 | 0.13917500  |
| H   | 4.26858000  | -2.19674600 | 0.10265900  |
| H   | 3.30304800  | -2.72808600 | 1.48899300  |
| C   | -0.82609000 | 0.83656100  | -0.57984000 |
| C   | -1.97441000 | -0.05591000 | -0.48667500 |
| C   | -3.20242600 | 0.29727100  | 0.13056800  |
| C   | -1.86320400 | -1.36837300 | -1.01100000 |
| C   | -4.24191300 | -0.62346700 | 0.22515200  |
| H   | -3.32181100 | 1.29934400  | 0.52193700  |
| C   | -2.91178500 | -2.28421400 | -0.90454000 |
| H   | -0.95913600 | -1.64660600 | -1.54077500 |
| C   | -4.10919400 | -1.92296300 | -0.28339400 |
| H   | -5.17160500 | -0.32263800 | 0.70161300  |
| H   | -2.79543800 | -3.28028700 | -1.32496200 |
| H   | -4.92883100 | -2.63178600 | -0.20829900 |
| C   | -0.78467000 | 2.17296700  | -0.02191000 |
| O   | 0.29697300  | 0.34963800  | -1.11881000 |
| O   | -1.74367500 | 2.85149500  | 0.34396900  |
| O   | 0.50314000  | 2.68286400  | 0.04627900  |
| C   | 0.58368900  | 4.04200700  | 0.49370800  |
| H   | 0.03587800  | 4.70624900  | -0.18037700 |
| H   | 1.64656900  | 4.29151700  | 0.48676500  |
| H   | 0.17260200  | 4.15197700  | 1.50136000  |
| C   | 2.11585800  | -2.30997800 | -0.30966600 |
| H   | 2.22886900  | -2.39023900 | -1.39713600 |

|   |            |             |             |
|---|------------|-------------|-------------|
| H | 1.26268400 | -2.94246300 | -0.04533000 |
| C | 3.04415500 | 0.51991200  | -0.22024900 |
| H | 3.84905100 | 0.20113400  | 0.45375400  |
| H | 2.70723200 | 1.51136800  | 0.09648500  |
| C | 1.03071700 | -0.38370200 | 1.76193500  |
| H | 1.89499400 | -0.09698400 | 2.37305800  |
| H | 0.35889200 | 0.48640300  | 1.74220000  |
| C | 3.52667400 | 0.56904000  | -1.67867900 |
| H | 4.35670600 | 1.27633900  | -1.77228200 |
| H | 3.88504400 | -0.40588700 | -2.02609700 |
| H | 2.72307200 | 0.89891700  | -2.34206600 |

PO(Et)<sub>3</sub>:

|     |             |             |             |
|-----|-------------|-------------|-------------|
| 0 1 |             |             |             |
| P   | 0.06780900  | -0.45275600 | -0.45410400 |
| C   | 2.50019900  | -0.18824300 | 0.95231900  |
| H   | 2.68834300  | 0.82310600  | 0.57560500  |
| H   | 3.02926200  | -0.28933600 | 1.90558500  |
| H   | 2.93314400  | -0.89600400 | 0.24028900  |
| C   | -0.13242300 | 2.43425100  | -0.01612200 |
| H   | -0.15708900 | 3.40316700  | -0.52620200 |
| H   | -1.04632400 | 2.35510500  | 0.57883200  |
| H   | 0.71492100  | 2.45243400  | 0.67621200  |
| C   | 0.99886000  | -0.45760100 | 1.13793600  |
| H   | 0.84810900  | -1.45659500 | 1.56575200  |
| H   | 0.55035500  | 0.26036200  | 1.83479600  |
| C   | -1.64780400 | -0.98754200 | -0.02899900 |
| H   | -1.53371400 | -2.03652400 | 0.27140900  |
| H   | -2.18422000 | -1.00847000 | -0.98539100 |
| C   | 0.00096700  | 1.30044200  | -1.04437900 |
| H   | 0.92535500  | 1.41709100  | -1.62182500 |
| H   | -0.81461700 | 1.33834900  | -1.77736900 |
| C   | -2.44671200 | -0.20905100 | 1.02632300  |
| H   | -2.66718500 | 0.81227700  | 0.70258500  |
| H   | -3.40601600 | -0.70381400 | 1.21173700  |
| H   | -1.91951600 | -0.15315000 | 1.98429300  |
| O   | 0.67294200  | -1.36002400 | -1.49840100 |

P(Me)<sub>3</sub>:

|     |             |             |             |
|-----|-------------|-------------|-------------|
| 0 1 |             |             |             |
| P   | 0.00033800  | -0.00021500 | -0.60368500 |
| C   | 1.63521200  | -0.17419700 | 0.28013900  |
| H   | 2.11366100  | -1.11305600 | -0.01676500 |
| H   | 2.29993900  | 0.64382400  | -0.01568300 |
| H   | 1.52693900  | -0.16338400 | 1.37176300  |
| C   | -0.66679000 | 1.50287100  | 0.27971200  |
| H   | -0.09203200 | 2.38665500  | -0.01534700 |
| H   | -1.70707800 | 1.67034800  | -0.01743700 |
| H   | -0.62388800 | 1.40246100  | 1.37132400  |
| C   | -0.96884300 | -1.32837200 | 0.27991400  |
| H   | -2.02087400 | -1.27295000 | -0.01786800 |
| H   | -0.59301000 | -2.31344700 | -0.01483900 |
| H   | -0.90619200 | -1.23903800 | 1.37153800  |

TS1 when the PR is P(Me)<sub>3</sub>:

|     |             |             |             |
|-----|-------------|-------------|-------------|
| 0 1 |             |             |             |
| P   | -1.59914300 | -1.47621700 | 0.10214800  |
| C   | -1.44166000 | -0.74698500 | 1.76159200  |
| H   | -0.59543100 | -0.04406300 | 1.72568400  |
| H   | -2.33464800 | -0.18140800 | 2.03747300  |
| H   | -1.23521800 | -1.51824300 | 2.50636300  |
| C   | -3.27410900 | -1.19888000 | -0.55714700 |
| H   | -3.44391400 | -0.12100700 | -0.59248200 |
| H   | -3.32042400 | -1.58973700 | -1.57822700 |

|   |             |             |             |
|---|-------------|-------------|-------------|
| H | -4.03942800 | -1.69094700 | 0.05189400  |
| C | -1.43424600 | -3.31271200 | 0.26837900  |
| H | -1.40341900 | -3.75985200 | -0.72915900 |
| H | -0.49897600 | -3.54587900 | 0.78239300  |
| H | -2.27740400 | -3.74411200 | 0.82385500  |
| C | 0.18408600  | 0.60085800  | -0.55935000 |
| C | 1.57394600  | 0.23543600  | -0.31780200 |
| C | 2.53359800  | 1.11458100  | 0.24664600  |
| C | 1.99783500  | -1.07972400 | -0.63244800 |
| C | 3.83501500  | 0.68450000  | 0.48871400  |
| H | 2.23994500  | 2.12952200  | 0.48187000  |
| C | 3.30423100  | -1.50031200 | -0.37718300 |
| H | 1.30040000  | -1.75583800 | -1.11369600 |
| C | 4.23422200  | -0.62458900 | 0.18669900  |
| H | 4.54972600  | 1.38142300  | 0.91902500  |
| H | 3.59887500  | -2.51434200 | -0.63639600 |
| H | 5.25352800  | -0.94842200 | 0.37638400  |
| C | -0.41310700 | 1.86441200  | -0.17848100 |
| O | -0.62464600 | -0.33488900 | -1.07411600 |
| O | 0.17669300  | 2.89643300  | 0.13664400  |
| O | -1.79903400 | 1.83095000  | -0.22404500 |
| C | -2.43476300 | 3.08467200  | 0.05849400  |
| H | -2.13608300 | 3.84407400  | -0.66918700 |
| H | -2.17754000 | 3.44064000  | 1.06007000  |
| H | -3.50723900 | 2.89395500  | -0.01462800 |

PO(Me)<sub>3</sub>:

|     |             |             |             |
|-----|-------------|-------------|-------------|
| O 1 |             |             |             |
| P   | -0.00014500 | 0.00013300  | 0.18198800  |
| C   | -1.65656900 | -0.26958200 | -0.55708900 |
| H   | -2.04788500 | -1.23032500 | -0.21037000 |
| H   | -2.33168900 | 0.51917900  | -0.21298800 |
| H   | -1.62372400 | -0.26585400 | -1.65121300 |
| C   | 0.59576100  | 1.56891200  | -0.55716400 |
| H   | -0.04178100 | 2.38835800  | -0.21305500 |
| H   | 1.61543200  | 1.75985300  | -0.21049200 |
| H   | 0.58553100  | 1.53750200  | -1.65128200 |
| C   | 1.06188400  | -1.30073500 | -0.55498800 |
| H   | 2.08996600  | -1.15736600 | -0.21022400 |
| H   | 0.71790100  | -2.27927600 | -0.20788100 |
| H   | 1.04071000  | -1.27719300 | -1.64917900 |
| O   | -0.00109200 | 0.00144400  | 1.68778800  |

PPh<sub>3</sub>:

|     |             |             |             |
|-----|-------------|-------------|-------------|
| O 1 |             |             |             |
| P   | -0.00035300 | -0.00073400 | -1.20810700 |
| C   | 0.28042700  | 1.64661100  | -0.40227100 |
| C   | -0.32399600 | 2.76228200  | -1.00856100 |
| C   | 1.07874400  | 1.85227500  | 0.73392300  |
| C   | -0.15655800 | 4.04389800  | -0.48060600 |
| H   | -0.92811600 | 2.62553500  | -1.90230300 |
| C   | 1.25861500  | 3.13743100  | 1.25511400  |
| H   | 1.56597200  | 1.00884700  | 1.21290000  |
| C   | 0.63880300  | 4.23535300  | 0.65332300  |
| H   | -0.63610900 | 4.89225700  | -0.96091400 |
| H   | 1.88273300  | 3.27806200  | 2.13346700  |
| H   | 0.77967800  | 5.23287700  | 1.05969800  |
| C   | 1.28673100  | -1.06778400 | -0.40314900 |
| C   | 1.06592900  | -1.86541500 | 0.73073800  |
| C   | 2.55600400  | -1.09833600 | -1.00792200 |
| C   | 2.09024900  | -2.66244400 | 1.25156400  |
| H   | 0.09149200  | -1.86971100 | 1.20889400  |
| C   | 3.58326400  | -1.88309400 | -0.48049300 |
| H   | 2.73960500  | -0.50460800 | -1.90025900 |
| C   | 3.35180400  | -2.67047600 | 0.65157900  |
| H   | 1.90018800  | -3.27544000 | 2.12845000  |

|   |             |             |             |
|---|-------------|-------------|-------------|
| H | 4.55833800  | -1.88880500 | -0.95964100 |
| H | 4.14615800  | -3.29015400 | 1.05784000  |
| C | -1.56796000 | -0.58063200 | -0.40214600 |
| C | -2.23837400 | -1.65480900 | -1.01390100 |
| C | -2.13932500 | 0.00229300  | 0.74021400  |
| C | -3.43230300 | -2.14955800 | -0.48541800 |
| H | -1.82285100 | -2.10465800 | -1.91244200 |
| C | -3.34208900 | -0.48385600 | 1.26227400  |
| H | -1.64866700 | 0.84126000  | 1.22370300  |
| C | -3.98929300 | -1.56272600 | 0.65490200  |
| H | -3.93247200 | -2.98340800 | -0.97007500 |
| H | -3.77110600 | -0.01823800 | 2.14541000  |
| H | -4.92358800 | -1.93888000 | 1.06191400  |

TS1 when the PR is PPh<sub>3</sub>:

0 1

|   |             |             |             |
|---|-------------|-------------|-------------|
| C | 1.45597600  | -0.93362800 | -1.14492800 |
| C | 2.66847100  | -0.12846600 | -1.05320100 |
| C | 3.95759800  | -0.67307300 | -0.81624100 |
| C | 2.57352700  | 1.27875900  | -1.19116600 |
| C | 5.07352200  | 0.15434700  | -0.71843700 |
| H | 4.06354700  | -1.74534000 | -0.71936400 |
| C | 3.69753600  | 2.09695000  | -1.08279100 |
| H | 1.61081600  | 1.72568000  | -1.40577800 |
| C | 4.95871300  | 1.54449600  | -0.84460900 |
| H | 6.04770200  | -0.29408800 | -0.54039500 |
| H | 3.58524000  | 3.17243100  | -1.19450500 |
| H | 5.83543100  | 2.18101100  | -0.76616200 |
| C | 1.41926900  | -2.37443800 | -0.96571900 |
| O | 0.29221300  | -0.31125700 | -1.36082100 |
| O | 2.38302600  | -3.13228300 | -0.86905800 |
| O | 0.13104600  | -2.87103800 | -0.94658200 |
| C | 0.03818000  | -4.29000700 | -0.76914000 |
| H | 0.49435500  | -4.59630000 | 0.17629200  |
| H | 0.53678600  | -4.81787000 | -1.58665800 |
| H | -1.02979200 | -4.51560100 | -0.76534300 |
| P | -0.83632300 | 0.34502000  | 0.04213900  |
| C | -0.75206400 | 2.12431300  | 0.34092200  |
| C | -0.99374100 | 2.99229200  | -0.74573000 |
| C | -0.37578600 | 2.67324600  | 1.58241200  |
| C | -0.87204400 | 4.37133800  | -0.58577800 |
| H | -1.27305800 | 2.58758600  | -1.71431500 |
| C | -0.25214800 | 4.05423300  | 1.73043300  |
| H | -0.18765200 | 2.02371300  | 2.43047000  |
| C | -0.49855800 | 4.90857800  | 0.65075800  |
| H | -1.06312900 | 5.02666600  | -1.43051000 |
| H | 0.03250500  | 4.46378700  | 2.69526400  |
| H | -0.40024100 | 5.98314400  | 0.77134400  |
| C | -0.49656000 | -0.57528400 | 1.54380500  |
| C | -1.45519900 | -1.41104400 | 2.14925200  |
| C | 0.82228900  | -0.55661800 | 2.04199300  |
| C | -1.10806800 | -2.18147700 | 3.25592600  |
| H | -2.46649200 | -1.45064700 | 1.75756500  |
| C | 1.15874200  | -1.33477400 | 3.15307300  |
| H | 1.58051500  | 0.06138300  | 1.57134100  |
| C | 0.19835200  | -2.14388800 | 3.76134200  |
| H | -1.85662400 | -2.81149000 | 3.72750000  |
| H | 2.17662800  | -1.31444400 | 3.53006300  |
| H | 0.46466900  | -2.75052000 | 4.62186800  |
| C | -2.47506000 | -0.03454500 | -0.62347300 |
| C | -2.63236300 | -1.18193500 | -1.42211400 |
| C | -3.58492500 | 0.79003200  | -0.36097600 |
| C | -3.89047500 | -1.49767700 | -1.94054600 |
| H | -1.77189300 | -1.80913200 | -1.62765800 |
| C | -4.83622100 | 0.46509300  | -0.88431400 |
| H | -3.47206300 | 1.68013300  | 0.24929700  |
| C | -4.99080400 | -0.67892500 | -1.67457000 |

|   |             |             |             |
|---|-------------|-------------|-------------|
| H | -4.00678300 | -2.38238300 | -2.55963800 |
| H | -5.68899200 | 1.10409700  | -0.67471900 |
| H | -5.96587700 | -0.92787000 | -2.08344200 |

POPh<sub>3</sub>:

|     |             |             |             |
|-----|-------------|-------------|-------------|
| O 1 |             |             |             |
| P   | 0.00096100  | -0.00053400 | 0.91797300  |
| C   | -0.48660800 | 1.62248800  | 0.21901200  |
| C   | -0.18150900 | 2.76004100  | 0.98448400  |
| C   | -1.14225400 | 1.77581000  | -1.01202000 |
| C   | -0.51026000 | 4.03200800  | 0.51330700  |
| H   | 0.30021000  | 2.63739500  | 1.94986900  |
| C   | -1.47439500 | 3.05072700  | -1.47838300 |
| H   | -1.40748200 | 0.90461000  | -1.60412800 |
| C   | -1.15792800 | 4.17850500  | -0.71773000 |
| H   | -0.27075100 | 4.90750000  | 1.10993100  |
| H   | -1.98653800 | 3.16096000  | -2.42998700 |
| H   | -1.41885800 | 5.16878500  | -1.08017600 |
| C   | -1.16392600 | -1.23507800 | 0.22090200  |
| C   | -0.97252400 | -1.87169600 | -1.01477800 |
| C   | -2.30030200 | -1.54184100 | 0.98728200  |
| C   | -1.91067800 | -2.79538900 | -1.48274700 |
| H   | -0.08538700 | -1.66254200 | -1.60465800 |
| C   | -3.23865800 | -2.46088300 | 0.51386400  |
| H   | -2.43130900 | -1.06975000 | 1.95666500  |
| C   | -3.04675200 | -3.08482000 | -0.72257200 |
| H   | -1.75521500 | -3.28440900 | -2.44010400 |
| H   | -4.11374400 | -2.69608200 | 1.11286700  |
| H   | -3.77578000 | -3.80198700 | -1.08905600 |
| C   | 1.65134700  | -0.39285700 | 0.21702600  |
| C   | 2.48437300  | -1.22656600 | 0.98037200  |
| C   | 2.11136500  | 0.10362800  | -1.01186300 |
| C   | 3.75063600  | -1.57597200 | 0.50923500  |
| H   | 2.14069700  | -1.57931500 | 1.94824100  |
| C   | 3.38041200  | -0.24902400 | -1.48126300 |
| H   | 1.49024600  | 0.77351400  | -1.60020200 |
| C   | 4.19923300  | -1.09024300 | -0.72269300 |
| H   | 4.39024400  | -2.21973600 | 1.10632500  |
| H   | 3.73175800  | 0.14362600  | -2.43098400 |
| H   | 5.18717800  | -1.35996500 | -1.08490500 |
| O   | 0.00511000  | -0.00095400 | 2.42526100  |

Solvent Phase

$\alpha$ -keto ester:

|     |             |             |             |
|-----|-------------|-------------|-------------|
| O 1 |             |             |             |
| C   | -0.50722100 | 0.89419500  | 0.12668200  |
| C   | 0.84490500  | 0.30016000  | 0.04008800  |
| C   | 1.04222800  | -1.09148700 | -0.01253300 |
| C   | 1.95477100  | 1.16385200  | -0.02478700 |
| C   | 2.33257100  | -1.60931400 | -0.12860200 |
| H   | 0.19702900  | -1.76882400 | 0.04240700  |
| C   | 3.24007100  | 0.64225400  | -0.13604500 |
| H   | 1.79050000  | 2.23544000  | 0.01266500  |
| C   | 3.43025300  | -0.74532400 | -0.18873600 |
| H   | 2.48102300  | -2.68364700 | -0.16942400 |
| H   | 4.09414700  | 1.31054300  | -0.18322200 |
| H   | 4.43371600  | -1.15091800 | -0.27667500 |
| C   | -1.71719500 | -0.03991500 | 0.31009800  |
| O   | -0.72873300 | 2.09890900  | 0.11340200  |
| O   | -1.85289600 | -0.75309700 | 1.28685400  |
| O   | -2.59609900 | 0.09636600  | -0.67964100 |
| C   | -3.82390500 | -0.67132700 | -0.57175600 |
| H   | -4.37367200 | -0.36524800 | 0.31982300  |
| H   | -3.59425800 | -1.73712900 | -0.52356500 |
| H   | -4.38553700 | -0.43619900 | -1.47339200 |



Phenyl carbamic acid:

0 1

|   |             |             |             |
|---|-------------|-------------|-------------|
| C | -2.18585700 | 0.10493700  | -0.00007300 |
| O | -3.30457800 | -0.67178700 | -0.00004300 |
| O | -2.22550700 | 1.32821300  | -0.00021700 |
| N | -1.07715700 | -0.68523900 | 0.00006700  |
| H | -1.25845800 | -1.68069800 | 0.00014700  |
| C | 0.28163600  | -0.29764500 | 0.00005000  |
| C | 0.70516500  | 1.04037200  | -0.00003300 |
| C | 1.23708800  | -1.32829500 | 0.00013400  |
| C | 2.07384200  | 1.32680900  | -0.00003500 |
| H | -0.02462100 | 1.83778500  | -0.00009600 |
| C | 2.59797100  | -1.02586100 | 0.00013300  |
| H | 0.91201000  | -2.36550300 | 0.00020100  |
| C | 3.02709600  | 0.30567500  | 0.00004800  |
| H | 2.39089700  | 2.36573000  | -0.00010000 |
| H | 3.32204800  | -1.83518500 | 0.00019900  |
| H | 4.08670200  | 0.54147600  | 0.00004700  |
| H | -4.06944000 | -0.07428600 | -0.00014000 |

P(NMe<sub>2</sub>)<sub>3</sub>:

0 1

|   |             |             |             |
|---|-------------|-------------|-------------|
| P | 0.00000300  | -0.02803200 | -0.73447100 |
| N | -0.00006000 | 1.54051700  | 0.07836800  |
| N | -1.42709500 | -0.66674000 | -0.00462900 |
| N | 1.42715900  | -0.66662000 | -0.00463200 |
| C | -1.20374800 | 2.34459900  | -0.16621900 |
| H | -2.10214300 | 1.76505500  | 0.04866800  |
| H | -1.18757700 | 3.21833200  | 0.49540000  |
| H | -1.26869500 | 2.71205000  | -1.20629700 |
| C | 1.20355800  | 2.34470300  | -0.16622700 |
| H | 1.18731400  | 3.21843600  | 0.49539100  |
| H | 2.10200500  | 1.76523800  | 0.04865600  |
| H | 1.26846700  | 2.71215800  | -1.20630600 |
| C | -2.12067900 | -1.73399700 | -0.71945700 |
| H | -1.84821300 | -2.73507100 | -0.34674300 |
| H | -3.20769700 | -1.62106300 | -0.60700100 |
| H | -1.88133300 | -1.69001600 | -1.78571800 |
| C | -1.71124300 | -0.65046900 | 1.42760600  |
| H | -2.79102200 | -0.53099500 | 1.59263500  |
| H | -1.39810500 | -1.58363500 | 1.92251400  |
| H | -1.19838600 | 0.18789700  | 1.90164100  |
| C | 2.12080900  | -1.73383900 | -0.71945400 |
| H | 3.20781900  | -1.62084200 | -0.60698600 |
| H | 1.84839900  | -2.73493100 | -0.34674500 |
| H | 1.88147200  | -1.68986900 | -1.78571700 |
| C | 1.71129600  | -0.65033700 | 1.42760600  |
| H | 2.79106600  | -0.53079600 | 1.59264100  |
| H | 1.19838400  | 0.18799600  | 1.90164000  |
| H | 1.39821200  | -1.58352300 | 1.92250900  |

Product:

0 1

|   |             |             |             |
|---|-------------|-------------|-------------|
| C | -1.78199300 | 0.61792100  | -0.83804600 |
| C | -2.51392900 | -0.58367400 | -0.27543100 |
| C | -2.34717100 | -1.03378200 | 1.04392500  |
| C | -3.37061000 | -1.29088100 | -1.13160600 |
| C | -3.02416800 | -2.17100300 | 1.48900800  |
| H | -1.69107300 | -0.49578400 | 1.71684300  |
| C | -4.04823800 | -2.42938600 | -0.68612600 |
| H | -3.51143300 | -0.94927500 | -2.15392200 |
| C | -3.87477600 | -2.87243500 | 0.62734100  |
| H | -2.88902300 | -2.50827000 | 2.51252600  |
| H | -4.70905400 | -2.96364700 | -1.36225100 |
| H | -4.40039600 | -3.75528100 | 0.97941500  |

|   |             |             |             |
|---|-------------|-------------|-------------|
| C | -1.83230300 | 1.89142100  | 0.02062000  |
| O | -2.62483000 | 2.07492300  | 0.92312500  |
| O | -0.98411000 | 2.81778900  | -0.44170900 |
| C | -0.98043300 | 4.08928800  | 0.24864800  |
| H | -1.96875700 | 4.54971600  | 0.19468200  |
| H | -0.24303900 | 4.69657400  | -0.27323000 |
| C | 0.54897700  | 0.21473500  | -0.33912800 |
| O | 0.39005300  | 0.48023100  | 0.84367700  |
| O | -0.43620200 | 0.29401600  | -1.27849600 |
| N | 1.70158000  | -0.18971400 | -0.94278100 |
| H | 1.62240000  | -0.37766300 | -1.93389000 |
| C | 2.97514000  | -0.39152000 | -0.36581100 |
| C | 3.26586000  | -0.13577800 | 0.98344800  |
| C | 3.98755700  | -0.87051300 | -1.21493000 |
| C | 4.55985800  | -0.36393500 | 1.46175100  |
| H | 2.49229400  | 0.23303200  | 1.64223100  |
| C | 5.27265300  | -1.09204200 | -0.72268600 |
| H | 3.76533500  | -1.06940600 | -2.26010700 |
| C | 5.56887900  | -0.84045200 | 0.62133400  |
| H | 4.77398200  | -0.16298200 | 2.50752600  |
| H | 6.04194800  | -1.46288000 | -1.39347100 |
| H | 6.56938500  | -1.01331700 | 1.00533600  |
| H | -2.26192300 | 0.89724100  | -1.78099600 |
| H | -0.69280900 | 3.94649400  | 1.29213300  |

In 1B:

|     |             |             |             |
|-----|-------------|-------------|-------------|
| O 1 |             |             |             |
| P   | 1.27088900  | -0.56703000 | -0.01039100 |
| N   | 1.33582900  | 0.04976500  | 1.51686300  |
| N   | 1.02106000  | -2.19410100 | 0.16357300  |
| N   | 2.64146500  | -0.29814600 | -0.88563300 |
| C   | 0.22402100  | -0.11708800 | 2.46926100  |
| H   | -0.48559100 | -0.86363200 | 2.11212900  |
| H   | 0.62365000  | -0.44151300 | 3.43701900  |
| H   | -0.30924300 | 0.82986500  | 2.59929900  |
| C   | 2.29547900  | 1.09343700  | 1.89973700  |
| H   | 2.70475100  | 0.85047500  | 2.88604700  |
| H   | 3.11729100  | 1.14381900  | 1.18594000  |
| H   | 1.80726900  | 2.07270300  | 1.94393800  |
| C   | 0.76550200  | -3.00942100 | -1.03320500 |
| H   | 1.64757900  | -3.61408700 | -1.27835400 |
| H   | -0.08028300 | -3.67997000 | -0.84989200 |
| H   | 0.52867500  | -2.37826400 | -1.89027400 |
| C   | 1.36818900  | -2.98158000 | 1.35321200  |
| H   | 0.49487400  | -3.55261700 | 1.68746400  |
| H   | 2.17479800  | -3.68641100 | 1.11559700  |
| H   | 1.70006100  | -2.33503600 | 2.16340700  |
| C   | 2.84828800  | 0.84593800  | -1.78629900 |
| H   | 3.63183300  | 1.50495100  | -1.39201400 |
| H   | 3.16597700  | 0.47276400  | -2.76635800 |
| H   | 1.92842500  | 1.41524500  | -1.88889500 |
| C   | 3.84502400  | -1.10882800 | -0.65963100 |
| H   | 4.61624900  | -0.52777800 | -0.13913300 |
| H   | 3.61731100  | -1.99388000 | -0.06530300 |
| H   | 4.24575100  | -1.43480100 | -1.62534600 |
| C   | -1.00144900 | 0.80522300  | -0.41236800 |
| C   | -2.25516600 | 0.09867100  | -0.31651400 |
| C   | -3.42821800 | 0.69720900  | 0.23083500  |
| C   | -2.39114200 | -1.23993900 | -0.77545600 |
| C   | -4.63041500 | -0.00352700 | 0.30984700  |
| H   | -3.37139900 | 1.71832200  | 0.58419800  |
| C   | -3.60077000 | -1.92935800 | -0.68920600 |
| H   | -1.53859300 | -1.73543500 | -1.21894700 |
| C   | -4.73937000 | -1.32512000 | -0.14430900 |
| H   | -5.49844900 | 0.49437500  | 0.73666100  |

|   |             |             |             |
|---|-------------|-------------|-------------|
| H | -3.65183800 | -2.95091200 | -1.05962000 |
| H | -5.68042800 | -1.86323800 | -0.07844400 |
| C | -0.78608000 | 2.17848800  | -0.21644300 |
| O | 0.11877300  | 0.04505600  | -0.94321600 |
| O | -1.62185500 | 3.02566800  | 0.17386400  |
| O | 0.52098400  | 2.58507500  | -0.49410400 |
| C | 0.78616400  | 3.98116800  | -0.33130700 |
| H | 0.15886500  | 4.58515800  | -0.99344700 |
| H | 1.83706700  | 4.11212700  | -0.59602300 |
| H | 0.62003600  | 4.30257100  | 0.70132100  |

In 2:

0 1

|   |             |             |             |
|---|-------------|-------------|-------------|
| P | -2.01011300 | -1.52714000 | -0.13145200 |
| N | -1.33057100 | -1.49583200 | -1.62265800 |
| N | -1.47844800 | -2.79198800 | 0.77433600  |
| N | -3.64638800 | -1.53085400 | -0.33489600 |
| C | -0.20673000 | -2.36222500 | -2.01556000 |
| H | -0.07771300 | -3.17204800 | -1.29922100 |
| H | -0.43043400 | -2.79797000 | -2.99508000 |
| H | 0.71371800  | -1.77598900 | -2.07123400 |
| C | -1.65748900 | -0.45707200 | -2.61679700 |
| H | -1.95042500 | -0.93881000 | -3.55624800 |
| H | -2.48637400 | 0.16238000  | -2.27208200 |
| H | -0.77939900 | 0.17334800  | -2.78254200 |
| C | -0.17265200 | -2.77631000 | 1.45836700  |
| H | -0.32326700 | -2.87813800 | 2.53868000  |
| H | 0.43646500  | -3.61664900 | 1.10586700  |
| H | 0.36768400  | -1.85220800 | 1.25254400  |
| C | -2.17332600 | -4.08456200 | 0.79904400  |
| H | -1.62233000 | -4.84003100 | 0.22579100  |
| H | -2.25728500 | -4.42383300 | 1.83675700  |
| H | -3.17796800 | -3.99482700 | 0.38548600  |
| C | -4.54851900 | -1.17166000 | 0.77031200  |
| H | -5.30819800 | -0.47345300 | 0.40437600  |
| H | -5.04863100 | -2.06468100 | 1.16411100  |
| H | -3.99487600 | -0.69092800 | 1.57528500  |
| C | -4.31794100 | -2.17078500 | -1.47507600 |
| H | -5.02592100 | -1.46470100 | -1.92187900 |
| H | -3.59294100 | -2.46944300 | -2.23106400 |
| H | -4.87057000 | -3.05903700 | -1.14570300 |
| C | -0.97050000 | 0.95974400  | 0.45522500  |
| C | -1.92784900 | 2.06592700  | 0.04712600  |
| C | -1.64308900 | 2.83571500  | -1.08714800 |
| C | -3.06790700 | 2.35852900  | 0.80968300  |
| C | -2.49245400 | 3.88190100  | -1.46117600 |
| H | -0.75488100 | 2.61418900  | -1.67124800 |
| C | -3.91873200 | 3.39968400  | 0.43285900  |
| H | -3.29185900 | 1.77393000  | 1.69712700  |
| C | -3.63270100 | 4.16425100  | -0.70422100 |
| H | -2.26306700 | 4.47233300  | -2.34342000 |
| H | -4.80056100 | 3.61741100  | 1.02836000  |
| H | -4.29417000 | 4.97489500  | -0.99556200 |
| C | -0.12450300 | 1.39200300  | 1.65766300  |
| O | -1.68353000 | -0.26073000 | 0.79975200  |
| O | 0.52664500  | 2.42004100  | 1.62863500  |
| O | -0.17461700 | 0.56032600  | 2.69942400  |
| C | 0.64129600  | 0.92177500  | 3.83970500  |
| H | 0.32876800  | 1.89071600  | 4.23370800  |
| H | 1.69271900  | 0.96046900  | 3.54949700  |
| C | 2.22949100  | 0.28528200  | -0.94803200 |
| O | 1.36335700  | 0.79739500  | -1.72357400 |
| O | 2.01340900  | -0.44578200 | 0.05483000  |

|   |             |             |             |
|---|-------------|-------------|-------------|
| N | 3.57137100  | 0.60296500  | -1.29747200 |
| H | 3.63096100  | 1.21155500  | -2.10218900 |
| C | 4.78613700  | 0.25485200  | -0.70652600 |
| C | 4.90597100  | -0.60069300 | 0.40819700  |
| C | 5.96701300  | 0.78970100  | -1.26899600 |
| C | 6.16849600  | -0.89799200 | 0.92928500  |
| H | 4.00724800  | -1.01388300 | 0.84496100  |
| C | 7.21841200  | 0.48289000  | -0.73813500 |
| H | 5.89360800  | 1.45140200  | -2.12914100 |
| C | 7.33428600  | -0.36588100 | 0.36957900  |
| H | 6.23564600  | -1.55935200 | 1.78969500  |
| H | 8.10710200  | 0.91161300  | -1.19386800 |
| H | 8.30882100  | -0.60465000 | 0.78468200  |
| H | -0.24644900 | 0.75809900  | -0.34742800 |
| H | 0.47216100  | 0.13492200  | 4.57279900  |

TS1:

0 1

|   |             |             |             |
|---|-------------|-------------|-------------|
| P | 1.33389000  | -0.54609200 | -0.11439200 |
| N | 0.91178700  | -0.25541300 | 1.48470400  |
| N | 1.47047100  | -2.22993800 | -0.18009000 |
| N | 2.77745600  | 0.29953800  | -0.33638100 |
| C | -0.09810700 | -1.06313900 | 2.17804400  |
| H | -0.42339800 | -1.89428500 | 1.55325500  |
| H | 0.32200600  | -1.46425400 | 3.10921400  |
| H | -0.97275600 | -0.45035600 | 2.42382100  |
| C | 1.31831500  | 0.94137500  | 2.22623300  |
| H | 1.81669500  | 0.64482000  | 3.15837100  |
| H | 2.00431600  | 1.54073900  | 1.63076000  |
| H | 0.44258300  | 1.55022800  | 2.47986100  |
| C | 1.31292000  | -2.87420900 | -1.48825400 |
| H | 2.28507200  | -3.13693200 | -1.92785500 |
| H | 0.72295200  | -3.79212700 | -1.37972300 |
| H | 0.78911500  | -2.20913500 | -2.17808800 |
| C | 2.16280500  | -3.06024200 | 0.81403800  |
| H | 1.58885600  | -3.97903000 | 0.98546500  |
| H | 3.16828500  | -3.33865700 | 0.46955800  |
| H | 2.25173400  | -2.52799400 | 1.76142700  |
| C | 2.98641200  | 1.05963000  | -1.57603100 |
| H | 3.60421500  | 1.93707800  | -1.35265200 |
| H | 3.50370800  | 0.46027400  | -2.33883500 |
| H | 2.02768500  | 1.39965100  | -1.96456300 |
| C | 4.01796900  | -0.14832700 | 0.30936800  |
| H | 4.66203400  | 0.72119100  | 0.48532800  |
| H | 3.80420400  | -0.61094900 | 1.27464300  |
| H | 4.56922800  | -0.86629000 | -0.31372900 |
| C | -1.10697600 | 0.87819700  | -0.72037400 |
| C | -2.28582900 | 0.05072200  | -0.44198400 |
| C | -3.40873900 | 0.48398800  | 0.30799300  |
| C | -2.32013500 | -1.27401200 | -0.94470000 |
| C | -4.49132900 | -0.36604700 | 0.53853000  |
| H | -3.42122600 | 1.49199800  | 0.70037900  |
| C | -3.40386800 | -2.11843200 | -0.70523700 |
| H | -1.48690500 | -1.62857300 | -1.53955500 |
| C | -4.50248000 | -1.67399800 | 0.03938300  |
| H | -5.33590700 | -0.00047100 | 1.11750700  |
| H | -3.39292800 | -3.12766700 | -1.10941800 |
| H | -5.34923700 | -2.32933000 | 0.22212000  |
| C | -0.96872800 | 2.25304000  | -0.27191900 |
| O | -0.08681100 | 0.33458500  | -1.36215800 |
| O | -1.84494000 | 2.95869400  | 0.24721900  |
| O | 0.28356300  | 2.75808700  | -0.51056300 |
| C | 0.48914000  | 4.12636400  | -0.13119400 |

|   |             |            |             |
|---|-------------|------------|-------------|
| H | -0.17768600 | 4.79002300 | -0.68852000 |
| H | 1.52839700  | 4.34423800 | -0.37949700 |
| H | 0.31987700  | 4.26749400 | 0.93961000  |

TS2 si face:

0 1

|   |             |             |             |
|---|-------------|-------------|-------------|
| P | 2.43088800  | -1.04459600 | -0.51224800 |
| N | 3.73766300  | -0.46442800 | 0.30755900  |
| N | 2.18320300  | -2.65806900 | -0.28592700 |
| N | 2.70039800  | -0.72750000 | -2.11303900 |
| C | 4.39517700  | -1.21310900 | 1.38606300  |
| H | 4.01503300  | -2.23244400 | 1.43697700  |
| H | 5.47300700  | -1.24814100 | 1.19301800  |
| H | 4.22168600  | -0.72644800 | 2.35130400  |
| C | 4.19456500  | 0.92921300  | 0.17741300  |
| H | 5.26736100  | 0.94297900  | -0.04562700 |
| H | 3.66185300  | 1.43927200  | -0.62500300 |
| H | 4.02015500  | 1.47461700  | 1.11111000  |
| C | 1.27038700  | -3.24387700 | 0.70636500  |
| H | 0.61438100  | -3.96122400 | 0.20136300  |
| H | 1.83632900  | -3.77147100 | 1.48385600  |
| H | 0.67130500  | -2.46677700 | 1.17166000  |
| C | 3.01787200  | -3.64175600 | -0.98928100 |
| H | 3.70930800  | -4.13485800 | -0.29521100 |
| H | 2.37382100  | -4.40336000 | -1.44135500 |
| H | 3.59982900  | -3.16912300 | -1.78095600 |
| C | 1.61979700  | -0.97004000 | -3.08109900 |
| H | 1.55248900  | -0.12556900 | -3.77449300 |
| H | 1.81922700  | -1.88264400 | -3.65624200 |
| H | 0.66133800  | -1.07993800 | -2.57303800 |
| C | 4.02353400  | -0.56150600 | -2.72714500 |
| H | 4.06042800  | 0.38342700  | -3.28040800 |
| H | 4.80599600  | -0.55997600 | -1.97021800 |
| H | 4.21874500  | -1.38315000 | -3.42733000 |
| C | 0.80823200  | 0.79169700  | 0.71739100  |
| C | 0.87388200  | 2.06857900  | -0.02172300 |
| C | 1.05826600  | 3.31783000  | 0.61866600  |
| C | 0.67660800  | 2.08958200  | -1.42134000 |
| C | 1.06928900  | 4.50772000  | -0.11241300 |
| H | 1.19159900  | 3.34318100  | 1.69174500  |
| C | 0.69079500  | 3.28271200  | -2.14497000 |
| H | 0.49578700  | 1.16092300  | -1.94527100 |
| C | 0.89079500  | 4.50703500  | -1.49964000 |
| H | 1.22087900  | 5.44646000  | 0.41476700  |
| H | 0.53524200  | 3.25155300  | -3.22039500 |
| H | 0.89961100  | 5.43632500  | -2.06165000 |
| C | 1.12880200  | 0.65089800  | 2.11406800  |
| O | 1.02226800  | -0.40166900 | -0.09369300 |
| O | 1.11025700  | 1.55767100  | 2.95736900  |
| O | 1.36563300  | -0.64865100 | 2.49345000  |
| C | 1.49438600  | -0.87786400 | 3.90617200  |
| H | 1.67132300  | -1.94865600 | 4.01052300  |
| H | 0.57760900  | -0.59468300 | 4.42968600  |
| C | -2.78038900 | 0.17565600  | 0.39617900  |
| O | -1.96877500 | 0.69240700  | 1.31205900  |
| O | -2.43274700 | -0.27446600 | -0.69719400 |
| N | -4.08826600 | 0.20933000  | 0.84056600  |
| H | -4.20579100 | 0.61305300  | 1.76008700  |
| C | -5.26119200 | -0.23154000 | 0.20255800  |
| C | -5.28388800 | -0.82471500 | -1.07190300 |
| C | -6.47298800 | -0.06037800 | 0.89909200  |
| C | -6.50253000 | -1.23342100 | -1.62253900 |
| H | -4.35847500 | -0.95836400 | -1.61415800 |

|   |             |             |             |
|---|-------------|-------------|-------------|
| C | -7.67941500 | -0.47320600 | 0.33644900  |
| H | -6.46474300 | 0.39808800  | 1.88483500  |
| C | -7.70524700 | -1.06471200 | -0.93164000 |
| H | -6.50338400 | -1.68991900 | -2.60861700 |
| H | -8.60114800 | -0.33072900 | 0.89332600  |
| H | -8.64452800 | -1.38646200 | -1.37081700 |
| H | -0.85775500 | 0.68087200  | 0.97873500  |
| H | 2.33363400  | -0.31434100 | 4.32115500  |

TS2 re face:

0 1

|   |             |             |             |
|---|-------------|-------------|-------------|
| P | -2.28735000 | -1.18570300 | -0.48015500 |
| N | -0.99459000 | -1.28800900 | -1.49053000 |
| N | -2.48818500 | -2.56368500 | 0.41201400  |
| N | -3.62692200 | -0.88749100 | -1.40403600 |
| C | -0.06535000 | -2.42517800 | -1.50869600 |
| H | -0.38342600 | -3.19905300 | -0.81262800 |
| H | -0.03349500 | -2.85356700 | -2.51700200 |
| H | 0.93949100  | -2.09573300 | -1.22951800 |
| C | -0.63504300 | -0.20225000 | -2.42192900 |
| H | -0.57571400 | -0.60527500 | -3.43973100 |
| H | -1.38740700 | 0.58604600  | -2.40203700 |
| H | 0.33187000  | 0.22441400  | -2.13929400 |
| C | -1.73028100 | -2.83591500 | 1.64235100  |
| H | -2.40384300 | -3.30072100 | 2.37013800  |
| H | -0.89532500 | -3.52292200 | 1.45359900  |
| H | -1.35550100 | -1.90815200 | 2.06930600  |
| C | -3.15839100 | -3.74128600 | -0.15592600 |
| H | -2.43391400 | -4.50304300 | -0.47112000 |
| H | -3.81172200 | -4.17795000 | 0.60643400  |
| H | -3.77036400 | -3.46484400 | -1.01435900 |
| C | -4.88388600 | -0.45618400 | -0.77370400 |
| H | -5.31753200 | 0.36559500  | -1.35367500 |
| H | -5.60549800 | -1.28217000 | -0.74285100 |
| H | -4.70256900 | -0.10549800 | 0.24203100  |
| C | -3.77266600 | -1.32306500 | -2.79783900 |
| H | -4.09200000 | -0.47540800 | -3.41409600 |
| H | -2.82781900 | -1.70166100 | -3.18519000 |
| H | -4.52731500 | -2.11561600 | -2.87869400 |
| C | -1.15185800 | 0.93586300  | 0.91024400  |
| C | -1.24074400 | 2.19890900  | 0.12205700  |
| C | -0.18823700 | 3.13769300  | 0.16813900  |
| C | -2.35379600 | 2.51006400  | -0.68279800 |
| C | -0.25622000 | 4.33378100  | -0.54692300 |
| H | 0.68909400  | 2.92138200  | 0.76501500  |
| C | -2.41497800 | 3.70471500  | -1.40795600 |
| H | -3.18421400 | 1.81649400  | -0.73817600 |
| C | -1.36883500 | 4.62819900  | -1.34435300 |
| H | 0.57232100  | 5.03496700  | -0.48976000 |
| H | -3.29021800 | 3.91272500  | -2.01819900 |
| H | -1.41528700 | 5.55610900  | -1.90705600 |
| C | -1.05621900 | 1.09608300  | 2.36262700  |
| O | -2.24076500 | 0.00078200  | 0.57567300  |
| O | -0.42538300 | 1.99239400  | 2.92588500  |
| O | -1.65905300 | 0.10199000  | 3.07751700  |
| C | -1.47578100 | 0.15302400  | 4.50405700  |
| H | -2.01243400 | -0.71159000 | 4.89519100  |
| H | -1.89364500 | 1.07494300  | 4.91520000  |
| C | 2.36436500  | -0.01066900 | 0.18795400  |
| O | 1.35258600  | -0.37074100 | 0.96497900  |
| O | 2.28624300  | 0.72853100  | -0.79642500 |
| N | 3.54088500  | -0.59349200 | 0.62300600  |
| H | 3.44115400  | -1.15855200 | 1.45546700  |

|   |             |             |             |
|---|-------------|-------------|-------------|
| C | 4.83685300  | -0.50645000 | 0.08408200  |
| C | 5.16057000  | 0.24581900  | -1.05876400 |
| C | 5.85518600  | -1.22186900 | 0.74310100  |
| C | 6.48058000  | 0.27030500  | -1.51937500 |
| H | 4.38518500  | 0.79982600  | -1.56880000 |
| C | 7.16634300  | -1.18679000 | 0.27162500  |
| H | 5.61404000  | -1.80573300 | 1.62804100  |
| C | 7.49144300  | -0.43941300 | -0.86604100 |
| H | 6.71474500  | 0.85731700  | -2.40328200 |
| H | 7.93482800  | -1.74626600 | 0.79741500  |
| H | 8.51260300  | -0.41092600 | -1.23351600 |
| H | 0.36395500  | 0.20259700  | 0.76625400  |
| H | -0.41546600 | 0.09059600  | 4.76142200  |

TS3:

|     |             |             |             |
|-----|-------------|-------------|-------------|
| 0 1 |             |             |             |
| P   | -3.13664600 | -0.46312100 | -0.09418800 |
| N   | -2.73444500 | -1.33524600 | -1.45894100 |
| N   | -3.79529300 | -1.62676700 | 0.92542100  |
| N   | -4.21239700 | 0.69115300  | -0.68223900 |
| C   | -2.12656100 | -2.67165100 | -1.37539900 |
| H   | -2.28060300 | -3.10144200 | -0.38694100 |
| H   | -2.58831400 | -3.32598900 | -2.12444600 |
| H   | -1.04918200 | -2.61993700 | -1.57286600 |
| C   | -2.49408100 | -0.68451300 | -2.75405700 |
| H   | -2.96071500 | -1.27703600 | -3.54999900 |
| H   | -2.92090600 | 0.31754300  | -2.76544700 |
| H   | -1.41864800 | -0.61667200 | -2.96159800 |
| C   | -3.71104400 | -1.46105400 | 2.38004300  |
| H   | -4.61006600 | -0.97551400 | 2.78700500  |
| H   | -3.61355100 | -2.44817600 | 2.84649300  |
| H   | -2.83767800 | -0.86393200 | 2.63681800  |
| C   | -4.90988400 | -2.47856000 | 0.50107600  |
| H   | -4.80496000 | -3.46593400 | 0.96565300  |
| H   | -5.88120300 | -2.06072000 | 0.80130800  |
| H   | -4.90450300 | -2.61057200 | -0.58139800 |
| C   | -4.34379300 | 1.98329300  | 0.00006400  |
| H   | -4.55989300 | 2.75909000  | -0.74366100 |
| H   | -5.16346900 | 1.97424400  | 0.73352100  |
| H   | -3.41434400 | 2.23281800  | 0.50918600  |
| C   | -5.41661400 | 0.30612700  | -1.42446700 |
| H   | -5.64739100 | 1.08479100  | -2.16071900 |
| H   | -5.25925000 | -0.63041000 | -1.96077200 |
| H   | -6.28728200 | 0.19272300  | -0.76310700 |
| C   | 0.05870400  | 0.32906400  | 0.25138500  |
| C   | 0.11442900  | 1.77923300  | 0.09281200  |
| C   | 0.03311700  | 2.26677100  | -1.22849300 |
| C   | 0.23322200  | 2.70029600  | 1.15116500  |
| C   | 0.07354700  | 3.63354400  | -1.48836100 |
| H   | -0.04812500 | 1.56049000  | -2.04881200 |
| C   | 0.26906300  | 4.06920300  | 0.88644200  |
| H   | 0.29196000  | 2.34604900  | 2.17113300  |
| C   | 0.19117300  | 4.54052900  | -0.42849500 |
| H   | 0.01474600  | 3.99206000  | -2.51140500 |
| H   | 0.35849600  | 4.77097100  | 1.71014000  |
| H   | 0.22169700  | 5.60792400  | -0.62642200 |
| C   | 0.22332000  | -0.52789800 | 1.48198000  |
| O   | -2.04035100 | 0.27862500  | 0.67334100  |
| O   | 0.09866800  | -1.73719300 | 1.44830100  |
| O   | 0.53326900  | 0.16169000  | 2.58484500  |
| C   | 0.75146200  | -0.61397700 | 3.78626800  |
| H   | 1.57788400  | -1.31117900 | 3.63622900  |
| H   | -0.15426400 | -1.16312500 | 4.05002300  |

|   |             |             |             |
|---|-------------|-------------|-------------|
| C | 2.35223400  | -0.67475100 | -1.14953000 |
| O | 1.47909400  | -1.02770400 | -1.97359400 |
| O | 2.15060200  | -0.03917900 | -0.04236200 |
| N | 3.67960900  | -0.99364400 | -1.45932700 |
| H | 3.75220400  | -1.50060700 | -2.33124100 |
| C | 4.88476100  | -0.78426900 | -0.77221300 |
| C | 4.99672000  | -0.06406000 | 0.43162100  |
| C | 6.05264500  | -1.33063100 | -1.34400200 |
| C | 6.24802300  | 0.09306800  | 1.03522900  |
| H | 4.10996700  | 0.36113200  | 0.88033900  |
| C | 7.29325800  | -1.16385100 | -0.73135100 |
| H | 5.98071400  | -1.88975500 | -2.27390400 |
| C | 7.40387000  | -0.44968100 | 0.46730700  |
| H | 6.31258300  | 0.65251200  | 1.96475400  |
| H | 8.17585800  | -1.59636100 | -1.19441900 |
| H | 8.36962000  | -0.31991300 | 0.94606300  |
| H | -0.10737100 | -0.25940800 | -0.63750600 |
| H | 0.99768100  | 0.11539300  | 4.55602200  |

PO(NMe<sub>2</sub>)<sub>3</sub>:

0 1

|   |             |             |             |
|---|-------------|-------------|-------------|
| P | 0.00002900  | -0.02553000 | -0.48945000 |
| N | -0.00188500 | 1.56032400  | 0.08862000  |
| N | -1.42184200 | -0.64642000 | 0.18137300  |
| N | 1.42339200  | -0.64300800 | 0.18136600  |
| C | -1.21925400 | 2.36907600  | -0.06248100 |
| H | -2.10797700 | 1.74998800  | 0.05672200  |
| H | -1.22748800 | 3.14818500  | 0.70796500  |
| H | -1.26110100 | 2.85907000  | -1.04647300 |
| C | 1.21355200  | 2.37200000  | -0.06240900 |
| H | 1.21986000  | 3.15113600  | 0.70802800  |
| H | 2.10376000  | 1.75506600  | 0.05686400  |
| H | 1.25428900  | 2.86208400  | -1.04640300 |
| C | -2.10679300 | -1.74933700 | -0.49717700 |
| H | -1.79974000 | -2.72993900 | -0.10220500 |
| H | -3.18879500 | -1.64785000 | -0.34844600 |
| H | -1.89518200 | -1.71638300 | -1.56559700 |
| C | -1.70742000 | -0.57945800 | 1.61504300  |
| H | -2.78994900 | -0.48225200 | 1.76338200  |
| H | -1.37281200 | -1.48253500 | 2.14679300  |
| H | -1.22497300 | 0.29012200  | 2.06273300  |
| C | 2.11099700  | -1.74425900 | -0.49721300 |
| H | 3.19275700  | -1.64011900 | -0.34856000 |
| H | 1.80640200  | -2.72561900 | -0.10221600 |
| H | 1.89922000  | -1.71183700 | -1.56561700 |
| C | 1.70881000  | -0.57540700 | 1.61504000  |
| H | 2.79110500  | -0.47562700 | 1.76338100  |
| H | 1.22429100  | 0.29300600  | 2.06275300  |
| H | 1.37636200  | -1.47929300 | 2.14677400  |
| O | 0.00031600  | -0.26077800 | -1.97905700 |

P(NC<sub>4</sub>H<sub>8</sub>)<sub>3</sub>:

0 1

|   |            |             |             |
|---|------------|-------------|-------------|
| P | 0.02435900 | 0.06525300  | -1.01050300 |
| C | 1.55089600 | -1.24254600 | 1.01111600  |
| C | 2.73716100 | -0.53858700 | -0.98674500 |
| C | 3.00373000 | -1.76091000 | 1.05424800  |
| H | 0.82841700 | -2.07006500 | 1.00522000  |
| H | 1.32278400 | -0.61858600 | 1.88643000  |
| C | 3.43141700 | -1.78544700 | -0.42314200 |
| H | 3.35647100 | 0.35602600  | -0.80601500 |
| H | 2.55400200 | -0.59622700 | -2.06625300 |



|   |             |             |             |
|---|-------------|-------------|-------------|
| H | 3.63644700  | -1.05939200 | 1.61083900  |
| H | 3.07942400  | -2.73672900 | 1.54372300  |
| H | 4.51766400  | -1.76477100 | -0.55586400 |
| H | 3.04305700  | -2.68374700 | -0.91827000 |
| C | -1.90035700 | -0.67448100 | 0.97901600  |
| C | -1.68870700 | -2.12191200 | -0.95804300 |
| C | -2.93757500 | -1.81729400 | 1.06331000  |
| H | -2.37961200 | 0.31345300  | 0.97450300  |
| H | -1.21787200 | -0.69896300 | 1.84015300  |
| C | -3.10521600 | -2.28733000 | -0.39294900 |
| H | -1.07462800 | -3.00587300 | -0.71191100 |
| H | -1.66807200 | -2.00355400 | -2.04812500 |
| H | -2.53988800 | -2.63792600 | 1.67172900  |
| H | -3.87608100 | -1.49094900 | 1.52173700  |
| H | -3.47795400 | -3.31342300 | -0.47033000 |
| H | -3.79807700 | -1.62952500 | -0.93112700 |
| C | 0.33067000  | 2.06200600  | 1.01106800  |
| C | -0.97685600 | 2.65577800  | -0.94673800 |
| C | -0.09172800 | 3.54563700  | 1.09335900  |
| H | 1.42312000  | 1.94861400  | 1.00522700  |
| H | -0.04944200 | 1.49425100  | 1.87187700  |
| C | -0.36873300 | 3.94016500  | -0.36806000 |
| H | -2.05839800 | 2.61472200  | -0.73013000 |
| H | -0.85803100 | 2.57265600  | -2.03383600 |
| H | -1.01166400 | 3.64076800  | 1.68205500  |
| H | 0.67243300  | 4.16676700  | 1.57059900  |
| H | -1.03306900 | 4.80518600  | -0.45924500 |
| H | 0.56941900  | 4.17264600  | -0.88619100 |
| N | 1.46683800  | -0.48130200 | -0.24770900 |
| N | -1.20303600 | -0.90454100 | -0.29880200 |
| N | -0.23501500 | 1.58971500  | -0.26370700 |

TS1 when the PR is P(NC<sub>4</sub>H<sub>8</sub>)<sub>3</sub>:

|     |             |             |             |
|-----|-------------|-------------|-------------|
| O 1 |             |             |             |
| P   | 0.88579400  | -0.24630900 | 0.00613900  |
| C   | 3.10533900  | -1.58479300 | -0.99808800 |
| C   | 1.22132800  | -1.34357400 | -2.55216800 |
| C   | 3.57111800  | -1.87539200 | -2.43132100 |
| H   | 3.11618700  | -2.49906100 | -0.38861000 |
| H   | 3.72556200  | -0.83648000 | -0.49605200 |
| C   | 2.27411200  | -2.29396100 | -3.14028200 |
| H   | 1.16912500  | -0.40886600 | -3.12098500 |
| H   | 0.22302600  | -1.78766600 | -2.54197100 |
| H   | 3.97490000  | -0.96359300 | -2.88630800 |
| H   | 4.34827800  | -2.64406300 | -2.46282800 |
| H   | 2.33206900  | -2.21329800 | -4.22930700 |
| H   | 2.02718800  | -3.33234800 | -2.89005000 |
| C   | 0.20836300  | -2.77732400 | 0.92018000  |
| C   | -0.30812800 | -0.93558900 | 2.41223900  |
| C   | -0.61963300 | -3.28957400 | 2.12070600  |
| H   | 1.15298100  | -3.31992200 | 0.81032500  |
| H   | -0.35121000 | -2.88358900 | -0.01651300 |
| C   | -0.41285200 | -2.23137800 | 3.21844300  |
| H   | -1.30862700 | -0.59225700 | 2.11227200  |
| H   | 0.18583600  | -0.12440100 | 2.95188900  |
| H   | -1.67879000 | -3.33915600 | 1.84806700  |
| H   | -0.30781400 | -4.29109500 | 2.42905600  |
| H   | -1.23126900 | -2.20295000 | 3.94330600  |
| H   | 0.52185000  | -2.41002600 | 3.76191200  |
| C   | 2.74902100  | 0.51535300  | 2.01229000  |
| C   | 2.43561600  | 2.00461300  | 0.08926400  |
| C   | 3.92584800  | 1.49608000  | 1.90052500  |
| H   | 3.06347200  | -0.53085900 | 2.04393700  |

|   |             |             |             |
|---|-------------|-------------|-------------|
| H | 2.16507200  | 0.71858400  | 2.91827100  |
| C | 3.32789000  | 2.68542500  | 1.13326500  |
| H | 1.60195900  | 2.62240500  | -0.24679800 |
| H | 3.02921600  | 1.71441800  | -0.79074200 |
| H | 4.32346200  | 1.76809700  | 2.88257400  |
| H | 4.73905100  | 1.04620500  | 1.31907700  |
| H | 2.71936400  | 3.30348300  | 1.80386800  |
| H | 4.08452200  | 3.32666600  | 0.67276500  |
| N | 1.71776400  | -1.08759100 | -1.17360500 |
| N | 0.49790900  | -1.35300800 | 1.23944100  |
| N | 1.93272300  | 0.79963700  | 0.79832900  |
| C | -1.66924700 | 1.19192200  | -0.82880700 |
| C | -2.77425900 | 0.25937900  | -0.58341700 |
| C | -2.64889600 | -1.07888000 | -1.03487300 |
| C | -3.96579900 | 0.59343600  | 0.111105400 |
| C | -3.65044700 | -2.02400400 | -0.81162700 |
| H | -1.76321100 | -1.36009100 | -1.59218600 |
| C | -4.96206000 | -0.35774300 | 0.33145600  |
| H | -4.10096600 | 1.60621800  | 0.46679900  |
| C | -4.81893600 | -1.67366100 | -0.12656000 |
| H | -3.52013000 | -3.03732200 | -1.18333500 |
| H | -5.86115400 | -0.06678400 | 0.86909600  |
| H | -5.60166900 | -2.40725000 | 0.04386000  |
| C | -1.76429700 | 2.61310800  | -0.54273100 |
| O | -0.52220600 | 0.70713300  | -1.25830800 |
| O | -2.79634100 | 3.24420300  | -0.27238100 |
| O | -0.56204100 | 3.26497800  | -0.65240800 |
| C | -0.60278900 | 4.68540200  | -0.44955000 |
| H | -0.96623900 | 4.92950700  | 0.55231100  |
| H | -1.24683500 | 5.16648900  | -1.19053900 |
| H | 0.42607800  | 5.02678200  | -0.56961400 |

PO(NC<sub>4</sub>H<sub>8</sub>)<sub>3</sub>:

|     |             |             |             |
|-----|-------------|-------------|-------------|
| O 1 |             |             |             |
| P   | -0.04609500 | -0.12316300 | 0.73363400  |
| C   | 1.75740600  | 0.37897100  | -1.33147000 |
| C   | 2.70855500  | -0.53250000 | 0.72865500  |
| C   | 3.22746700  | -0.01497900 | -1.56028300 |
| H   | 1.61948000  | 1.46368900  | -1.43721100 |
| H   | 1.08532900  | -0.11299400 | -2.04508300 |
| C   | 3.83415600  | 0.02995500  | -0.14871600 |
| H   | 2.74524800  | -1.63232300 | 0.74535700  |
| H   | 2.75056200  | -0.17978800 | 1.76134000  |
| H   | 3.28439500  | -1.03471200 | -1.95851300 |
| H   | 3.72672300  | 0.65107600  | -2.26978000 |
| H   | 4.75824800  | -0.54837800 | -0.05921800 |
| H   | 4.05089600  | 1.06580100  | 0.13831900  |
| C   | -1.53291900 | 1.64489100  | -0.87973900 |
| C   | -0.68698300 | 2.47356400  | 1.25824200  |
| C   | -1.43856300 | 3.17716800  | -0.91432600 |
| H   | -2.58293200 | 1.32353900  | -0.90000700 |
| H   | -1.02678800 | 1.17228400  | -1.72509700 |
| C   | -1.52053200 | 3.56340200  | 0.57036700  |
| H   | 0.37727700  | 2.75171700  | 1.27385000  |
| H   | -0.99966200 | 2.28603600  | 2.28892100  |
| H   | -0.47200100 | 3.48616000  | -1.32998800 |
| H   | -2.22824800 | 3.62581700  | -1.52414800 |
| H   | -1.13978600 | 4.56701000  | 0.77997800  |
| H   | -2.56018900 | 3.51645600  | 0.91562700  |
| C   | -0.19159700 | -2.52920300 | -0.56913700 |
| C   | -2.32312200 | -1.51912700 | 0.05616600  |
| C   | -1.34295500 | -3.44136900 | -1.00860800 |
| H   | 0.34463600  | -2.97942100 | 0.27870900  |
| H   | 0.53280700  | -2.34634200 | -1.36798600 |
| C   | -2.47444100 | -3.04492400 | -0.04884500 |

|   |             |             |             |
|---|-------------|-------------|-------------|
| H | -2.91815000 | -1.01431300 | -0.71518400 |
| H | -2.64281400 | -1.13614300 | 1.03018100  |
| H | -1.62660500 | -3.21802600 | -2.04408100 |
| H | -1.07444700 | -4.50006900 | -0.95070200 |
| H | -3.46719700 | -3.33877600 | -0.40191700 |
| H | -2.31258600 | -3.50849600 | 0.93131300  |
| N | 1.48387400  | -0.04512200 | 0.05801000  |
| N | -0.91149100 | 1.27343200  | 0.41541500  |
| N | -0.87372300 | -1.26758000 | -0.18048200 |
| O | 0.07981500  | -0.36449400 | 2.21969300  |

P(NMe<sub>2</sub>)<sub>2</sub>Et:

|     |             |             |             |
|-----|-------------|-------------|-------------|
| 0 1 |             |             |             |
| P   | -0.01042800 | -0.02448200 | -0.85809100 |
| N   | 1.15328700  | -0.77088400 | 0.25699100  |
| N   | -1.45610400 | -0.25580500 | 0.02907000  |
| C   | 2.55681600  | -0.51390500 | -0.08502800 |
| H   | 2.76534000  | 0.55721000  | -0.10789500 |
| H   | 3.19680100  | -0.96041100 | 0.68415700  |
| H   | 2.85333700  | -0.94598500 | -1.05842200 |
| C   | 0.92569400  | -2.21206700 | 0.41882300  |
| H   | 1.56915700  | -2.58733300 | 1.22289300  |
| H   | -0.11398800 | -2.39971800 | 0.69529000  |
| H   | 1.15196900  | -2.79014900 | -0.49566300 |
| C   | 0.68229200  | 2.42628800  | 0.69426800  |
| H   | 1.06201000  | 3.44856200  | 0.58049600  |
| H   | -0.25186800 | 2.48388200  | 1.25840800  |
| H   | 1.40260500  | 1.86772600  | 1.29905700  |
| C   | -2.69154200 | -0.52828400 | -0.69468800 |
| H   | -3.24118200 | -1.35303200 | -0.21826500 |
| H   | -3.35935300 | 0.34770800  | -0.72038700 |
| H   | -2.46688400 | -0.81475900 | -1.72545500 |
| C   | -1.64758900 | 0.05886800  | 1.44029700  |
| H   | -2.22028500 | -0.74399700 | 1.92607100  |
| H   | -0.68077800 | 0.13605800  | 1.93950400  |
| H   | -2.20249000 | 0.99927100  | 1.58529100  |
| C   | 0.47047000  | 1.78398000  | -0.68436400 |
| H   | -0.33075700 | 2.30574600  | -1.22489900 |
| H   | 1.36566500  | 1.91399300  | -1.30709000 |

TS1 when the PR is P(NMe<sub>2</sub>)<sub>2</sub>Et:

|     |             |             |             |
|-----|-------------|-------------|-------------|
| 0 1 |             |             |             |
| P   | -0.01042800 | -0.02448200 | -0.85809100 |
| N   | 1.15328700  | -0.77088400 | 0.25699100  |
| N   | -1.45610400 | -0.25580500 | 0.02907000  |
| C   | 2.55681600  | -0.51390500 | -0.08502800 |
| H   | 2.76534000  | 0.55721000  | -0.10789500 |
| H   | 3.19680100  | -0.96041100 | 0.68415700  |
| H   | 2.85333700  | -0.94598500 | -1.05842200 |
| C   | 0.92569400  | -2.21206700 | 0.41882300  |
| H   | 1.56915700  | -2.58733300 | 1.22289300  |
| H   | -0.11398800 | -2.39971800 | 0.69529000  |
| H   | 1.15196900  | -2.79014900 | -0.49566300 |
| C   | 0.68229200  | 2.42628800  | 0.69426800  |
| H   | 1.06201000  | 3.44856200  | 0.58049600  |
| H   | -0.25186800 | 2.48388200  | 1.25840800  |
| H   | 1.40260500  | 1.86772600  | 1.29905700  |
| C   | -2.69154200 | -0.52828400 | -0.69468800 |
| H   | -3.24118200 | -1.35303200 | -0.21826500 |
| H   | -3.35935300 | 0.34770800  | -0.72038700 |
| H   | -2.46688400 | -0.81475900 | -1.72545500 |
| C   | -1.64758900 | 0.05886800  | 1.44029700  |
| H   | -2.22028500 | -0.74399700 | 1.92607100  |
| H   | -0.68077800 | 0.13605800  | 1.93950400  |
| H   | -2.20249000 | 0.99927100  | 1.58529100  |
| C   | 0.47047000  | 1.78398000  | -0.68436400 |

|   |             |            |             |
|---|-------------|------------|-------------|
| H | -0.33075700 | 2.30574600 | -1.22489900 |
| H | 1.36566500  | 1.91399300 | -1.30709000 |

PO(NMe<sub>2</sub>)<sub>2</sub>Et:

0 1

|   |             |             |             |
|---|-------------|-------------|-------------|
| P | 0.00041700  | 0.02180800  | 0.60326600  |
| N | -1.22162900 | -0.66773800 | -0.35156600 |
| N | 1.39267700  | -0.36036300 | -0.26608100 |
| C | -2.61135100 | -0.24103300 | -0.14048600 |
| H | -2.68204800 | 0.84191600  | -0.03695000 |
| H | -3.20376900 | -0.53082300 | -1.01471900 |
| H | -3.06108200 | -0.70829900 | 0.74842500  |
| C | -1.13061300 | -2.11299400 | -0.60967100 |
| H | -1.69294600 | -2.34824900 | -1.51982900 |
| H | -0.09068500 | -2.40677500 | -0.75788800 |
| H | -1.54859200 | -2.70484600 | 0.21788300  |
| C | -0.41195300 | 2.54625200  | -0.76588800 |
| H | -0.62104000 | 3.60996000  | -0.61236200 |
| H | 0.52399200  | 2.47179500  | -1.32540200 |
| H | -1.21013200 | 2.13517400  | -1.39089400 |
| C | 2.66989900  | -0.50162700 | 0.43362900  |
| H | 3.21883200  | -1.36016000 | 0.02631300  |
| H | 3.29870300  | 0.39332100  | 0.31331400  |
| H | 2.49511200  | -0.67370800 | 1.49571100  |
| C | 1.52314400  | -0.18889600 | -1.71228700 |
| H | 2.02428100  | -1.06579600 | -2.14278800 |
| H | 0.54115500  | -0.09252600 | -2.17608800 |
| H | 2.12201400  | 0.69858300  | -1.96330000 |
| C | -0.31625900 | 1.83270100  | 0.59005600  |
| H | 0.51907600  | 2.23788600  | 1.17389500  |
| H | -1.21263500 | 2.01073100  | 1.19451600  |
| O | 0.12987200  | -0.45562800 | 2.03407400  |

P (NEt)<sub>3</sub>:

0 1

|   |             |             |             |
|---|-------------|-------------|-------------|
| P | 0.07241900  | 0.23025700  | -0.35179300 |
| N | -0.50579200 | 1.51370100  | 0.69715700  |
| N | -0.87680800 | -1.01298600 | 0.36132400  |
| N | 1.67138300  | 0.27299400  | 0.30596900  |
| H | 1.71289900  | 0.25920800  | 1.32482800  |
| H | 0.16236700  | 2.28113900  | 0.67298400  |
| H | -0.89120700 | -1.03871500 | 1.37973300  |
| C | -1.88024600 | 2.01357400  | 0.52201200  |
| H | -2.55033500 | 1.14850400  | 0.54267200  |
| H | -2.12258900 | 2.61801100  | 1.40497600  |
| C | -2.12791300 | 2.84154700  | -0.74568200 |
| H | -1.94059100 | 2.25166100  | -1.64930500 |
| H | -3.16588300 | 3.19330200  | -0.77787900 |
| H | -1.47342100 | 3.72083400  | -0.77376100 |
| C | -1.00975200 | -2.33061600 | -0.26728500 |
| H | -0.90074700 | -2.19220500 | -1.34926900 |
| H | -0.20287200 | -3.01157800 | 0.04524000  |
| C | -2.36266000 | -2.97704600 | 0.03698600  |
| H | -2.49942600 | -3.11206900 | 1.11634100  |
| H | -3.18438100 | -2.35569900 | -0.33440400 |
| H | -2.43147200 | -3.96383600 | -0.43482800 |
| C | 2.73896000  | -0.52490800 | -0.31118900 |
| H | 2.69075000  | -1.58070000 | -0.00086500 |
| H | 2.58099500  | -0.50865100 | -1.39560100 |
| C | 4.12371300  | 0.03462400  | 0.01739000  |
| H | 4.29965400  | 0.03770700  | 1.09953200  |
| H | 4.90492200  | -0.57803000 | -0.44642300 |
| H | 4.22552400  | 1.06254700  | -0.34627000 |

TS1 when the PR is P(NEt)<sub>3</sub>:

|     |             |             |             |
|-----|-------------|-------------|-------------|
| 0 1 |             |             |             |
| P   | -1.20336600 | 0.29704700  | -0.66880900 |
| N   | -0.88297500 | 0.28396500  | 0.95388500  |
| N   | -1.95063200 | 1.75798700  | -0.96551000 |
| N   | -2.21505900 | -0.79599000 | -1.38670700 |
| C   | 1.47029600  | -0.85693300 | -0.56063400 |
| C   | 2.52184900  | 0.07797700  | -0.16821500 |
| C   | 3.57002000  | -0.23916500 | 0.73601000  |
| C   | 2.51237000  | 1.39127900  | -0.70616800 |
| C   | 4.53722400  | 0.70617100  | 1.07628400  |
| H   | 3.61130200  | -1.23377200 | 1.16092400  |
| C   | 3.48189400  | 2.33065600  | -0.35323800 |
| H   | 1.73915000  | 1.66015800  | -1.41714900 |
| C   | 4.50647600  | 2.00072100  | 0.54094000  |
| H   | 5.32607600  | 0.42698800  | 1.77085000  |
| H   | 3.43968500  | 3.32667800  | -0.78773400 |
| H   | 5.26462500  | 2.73051600  | 0.81005100  |
| C   | 1.34620700  | -2.20538000 | -0.08274900 |
| O   | 0.53417800  | -0.42402200 | -1.43119500 |
| O   | 2.16262300  | -2.84579800 | 0.60043800  |
| O   | 0.15556500  | -2.79699300 | -0.47760900 |
| C   | -0.03073900 | -4.15606700 | -0.05855900 |
| H   | 0.73669900  | -4.80671000 | -0.48710100 |
| H   | -1.01461900 | -4.44469100 | -0.43093000 |
| H   | -0.00152100 | -4.24122200 | 1.03115600  |
| H   | -1.73295000 | -1.66915900 | -1.58603400 |
| H   | -2.32626100 | 1.82863700  | -1.90749000 |
| H   | -0.00982800 | -0.20544400 | 1.15834700  |
| C   | -1.50557200 | 3.05138200  | -0.40969300 |
| H   | -1.09118100 | 2.85963200  | 0.58142000  |
| H   | -0.70111800 | 3.46877400  | -1.02803100 |
| C   | -2.67281900 | 4.03245500  | -0.32607000 |
| H   | -2.32189900 | 4.98988300  | 0.07222300  |
| H   | -3.10619700 | 4.21968700  | -1.31475400 |
| H   | -3.46115100 | 3.65111200  | 0.33007700  |
| C   | -1.88530300 | 0.22098400  | 2.03882300  |
| H   | -2.25761600 | -0.80510700 | 2.15394200  |
| H   | -2.73294400 | 0.84831300  | 1.74753300  |
| C   | -1.29218600 | 0.71477000  | 3.35566500  |
| H   | -2.04430800 | 0.65134800  | 4.14865200  |
| H   | -0.43541000 | 0.10171700  | 3.65581100  |
| H   | -0.96002400 | 1.75403500  | 3.27294800  |
| C   | -3.69085200 | -0.85274400 | -1.39821800 |
| H   | -4.01170300 | -1.02922900 | -2.43102000 |
| H   | -4.06881700 | 0.13045800  | -1.10820300 |
| C   | -4.25742900 | -1.93673100 | -0.48096900 |
| H   | -5.34988500 | -1.95736700 | -0.55923300 |
| H   | -3.88127600 | -2.92616100 | -0.76233300 |
| H   | -3.99117600 | -1.75279400 | 0.56458600  |

PO(NEt)<sub>3</sub>:

|     |             |             |             |
|-----|-------------|-------------|-------------|
| 0 1 |             |             |             |
| P   | 0.08867600  | -0.17271700 | 0.76968100  |
| N   | 1.54902100  | -0.58965100 | 0.05297800  |
| N   | -0.74341600 | -1.63085000 | 0.65644000  |
| N   | -0.42286200 | 1.04052400  | -0.27699800 |
| O   | 0.03421500  | 0.30845400  | 2.19732400  |
| H   | -1.37193100 | -1.77953100 | 1.43875400  |
| H   | -0.33521600 | 0.81744500  | -1.26387700 |
| H   | 1.84610100  | -1.52219000 | 0.32610800  |
| C   | 2.67296600  | 0.35580000  | -0.08146900 |
| H   | 3.18261700  | 0.49854200  | 0.88177000  |
| H   | 2.25869700  | 1.32325600  | -0.37569400 |
| C   | 3.67278800  | -0.12895800 | -1.12961700 |
| H   | 3.19708700  | -0.22208300 | -2.11135300 |
| H   | 4.50563300  | 0.57730100  | -1.21240600 |

|   |             |             |             |
|---|-------------|-------------|-------------|
| H | 4.08900700  | -1.10569500 | -0.85696700 |
| C | -1.15418200 | -2.29064900 | -0.59209500 |
| H | -0.42430800 | -2.02825100 | -1.36378300 |
| H | -1.07480000 | -3.37475700 | -0.44617100 |
| C | -2.57061500 | -1.93677700 | -1.05446200 |
| H | -3.30855000 | -2.20502400 | -0.28998200 |
| H | -2.66669300 | -0.86581500 | -1.25931600 |
| H | -2.82026900 | -2.48509300 | -1.96999700 |
| C | -1.56688900 | 1.91010800  | 0.03635500  |
| H | -1.51829200 | 2.13997700  | 1.10379000  |
| H | -2.52235900 | 1.39407200  | -0.14206400 |
| C | -1.51856200 | 3.19792400  | -0.78405100 |
| H | -2.37921500 | 3.83118700  | -0.54426200 |
| H | -0.60329500 | 3.76089900  | -0.57439100 |
| H | -1.55031600 | 2.98403700  | -1.85887200 |

P(NMe<sub>2</sub>)Et<sub>2</sub>:

|     |             |             |             |
|-----|-------------|-------------|-------------|
| 0 1 |             |             |             |
| P   | 0.16701800  | 0.13712600  | -0.84741300 |
| N   | -1.27801900 | 0.17821900  | 0.11374800  |
| C   | 1.04421100  | 2.62220200  | 0.21382700  |
| H   | 0.06832600  | 2.81180800  | 0.67239100  |
| H   | 1.79735400  | 3.17201800  | 0.78951500  |
| H   | 1.02427500  | 3.04054700  | -0.79864900 |
| C   | -2.53209400 | -0.04122000 | -0.60668100 |
| H   | -2.79536200 | -1.10981200 | -0.69193700 |
| H   | -3.35463600 | 0.46113800  | -0.08075200 |
| H   | -2.46284100 | 0.37563000  | -1.61465500 |
| C   | -1.34847900 | -0.29783400 | 1.49358100  |
| H   | -2.18454300 | 0.19440000  | 2.00736300  |
| H   | -1.51227100 | -1.38645000 | 1.55949400  |
| H   | -0.43446800 | -0.05408800 | 2.03855100  |
| C   | 1.51290800  | -2.11587800 | 0.58606700  |
| H   | 1.91218800  | -3.12736800 | 0.44304500  |
| H   | 2.33935500  | -1.48714500 | 0.93199200  |
| H   | 0.77218800  | -2.16650500 | 1.38838900  |
| C   | 0.90979900  | -1.59414800 | -0.72706300 |
| H   | 1.67618100  | -1.61397300 | -1.51455700 |
| H   | 0.11704600  | -2.26957100 | -1.07481600 |
| C   | 1.36406800  | 1.12180800  | 0.19174400  |
| H   | 2.34874200  | 0.95278500  | -0.26383400 |
| H   | 1.42684200  | 0.73258800  | 1.21457400  |

TS1 when the PR is P(NMe<sub>2</sub>)Et<sub>2</sub>:

|     |             |             |             |
|-----|-------------|-------------|-------------|
| 0 1 |             |             |             |
| C   | -0.94193100 | 0.77336700  | -0.72843800 |
| C   | -2.11293500 | -0.07825300 | -0.50716000 |
| C   | -3.27784200 | 0.31681900  | 0.20005300  |
| C   | -2.07907900 | -1.40464900 | -1.00826400 |
| C   | -4.33588200 | -0.57060400 | 0.39173400  |
| H   | -3.33749600 | 1.32308100  | 0.59290700  |
| C   | -3.14149500 | -2.28747600 | -0.80526900 |
| H   | -1.21431000 | -1.72610600 | -1.57719500 |
| C   | -4.28058600 | -1.88048700 | -0.10398100 |
| H   | -5.21484100 | -0.23576600 | 0.93704600  |
| H   | -3.08014400 | -3.29653900 | -1.20534500 |
| H   | -5.11043200 | -2.56457000 | 0.04856500  |
| C   | -0.81620900 | 2.12130100  | -0.19520900 |
| O   | 0.08421600  | 0.25750800  | -1.37414200 |
| O   | -1.71696900 | 2.80207100  | 0.31290200  |
| O   | 0.44472900  | 2.64155800  | -0.35472100 |
| C   | 0.61758300  | 3.99955300  | 0.07748100  |
| H   | 1.66328000  | 4.23765500  | -0.12048900 |
| H   | 0.40248900  | 4.10331500  | 1.14435800  |
| H   | -0.03388800 | 4.67338100  | -0.48548900 |
| P   | 1.49604100  | -0.66322200 | -0.16381900 |

|   |             |             |             |
|---|-------------|-------------|-------------|
| N | 1.06748600  | -0.28311300 | 1.41598600  |
| C | 3.43731900  | 0.02314900  | -2.05716900 |
| H | 2.63226700  | 0.18539600  | -2.77954600 |
| H | 4.26467400  | 0.68863100  | -2.32068500 |
| H | 3.79422900  | -1.00538500 | -2.16478300 |
| C | 0.16592200  | -1.17333400 | 2.15374100  |
| H | 0.71930300  | -1.81871800 | 2.84986900  |
| H | -0.54722100 | -0.57227200 | 2.72758700  |
| H | -0.40777100 | -1.79938600 | 1.46754400  |
| C | 1.68587400  | 0.76327100  | 2.23327100  |
| H | 0.90630900  | 1.29870400  | 2.78599600  |
| H | 2.39313100  | 0.33201300  | 2.95554500  |
| H | 2.21338300  | 1.48759800  | 1.61478000  |
| C | 3.26386000  | -2.81361900 | 0.61152400  |
| H | 3.45441400  | -3.89057200 | 0.54164700  |
| H | 4.15575200  | -2.29550300 | 0.24833400  |
| H | 3.12969100  | -2.56421000 | 1.66809200  |
| C | 2.01753400  | -2.45804100 | -0.21359200 |
| H | 2.15919400  | -2.69454600 | -1.27401700 |
| H | 1.15075700  | -3.03941800 | 0.11441900  |
| C | 2.97318300  | 0.32975500  | -0.62260000 |
| H | 3.78010500  | 0.15406200  | 0.09685600  |
| H | 2.66639900  | 1.37567000  | -0.54965200 |

PO(NMe<sub>2</sub>)Et<sub>2</sub>:

|     |             |             |             |
|-----|-------------|-------------|-------------|
| O 1 |             |             |             |
| P   | -0.14469900 | -0.24705500 | 0.54723500  |
| N   | 0.27631200  | 1.22434400  | -0.18666300 |
| C   | -2.74300700 | -0.14161800 | -0.56994700 |
| H   | -2.57173300 | 0.82480100  | -1.05291700 |
| H   | -3.50915200 | -0.67425500 | -1.14201800 |
| H   | -3.13860000 | 0.04687500  | 0.43220400  |
| C   | 1.02971100  | 2.19684800  | 0.61022300  |
| H   | 2.11532700  | 2.11001100  | 0.44910100  |
| H   | 0.72357000  | 3.21117800  | 0.32765800  |
| H   | 0.81423800  | 2.05540900  | 1.67016900  |
| C   | 0.46378000  | 1.39082200  | -1.62801600 |
| H   | 0.11543100  | 2.38783400  | -1.92429800 |
| H   | 1.51970000  | 1.30089600  | -1.92304000 |
| H   | -0.11203700 | 0.65564200  | -2.19131800 |
| C   | 1.88050700  | -1.78546500 | -0.84045000 |
| H   | 2.68736700  | -2.51359600 | -0.70857800 |
| H   | 1.14668800  | -2.23018800 | -1.52006300 |
| H   | 2.30906700  | -0.90742400 | -1.33179400 |
| C   | 1.26450100  | -1.43438900 | 0.52218800  |
| H   | 0.89956700  | -2.33841500 | 1.02524100  |
| H   | 2.02053800  | -0.99673000 | 1.18541200  |
| C   | -1.45684700 | -0.97735600 | -0.50697200 |
| H   | -1.65780000 | -1.95399400 | -0.04956700 |
| H   | -1.07003400 | -1.18315100 | -1.51009400 |
| O   | -0.58596200 | -0.01906600 | 1.97998300  |

P(Et)<sub>3</sub>:

|     |             |             |             |
|-----|-------------|-------------|-------------|
| O 1 |             |             |             |
| P   | 0.05688700  | -0.38692600 | -0.90387600 |
| C   | 2.57225100  | -0.76860900 | 0.36689800  |
| H   | 2.83219800  | 0.28990000  | 0.25511000  |
| H   | 3.13259900  | -1.15550800 | 1.22557900  |
| H   | 2.92594800  | -1.29204100 | -0.52811400 |
| C   | 0.16134700  | 2.15982700  | 0.63244900  |
| H   | 0.17228600  | 3.25077300  | 0.52067900  |
| H   | -0.68346500 | 1.90216300  | 1.27599600  |
| H   | 1.07854300  | 1.87927000  | 1.15986400  |
| C   | 1.06201300  | -0.96526200 | 0.56681500  |
| H   | 0.84133500  | -2.03423400 | 0.67935200  |
| H   | 0.73522600  | -0.47645000 | 1.49137800  |

|   |             |             |             |
|---|-------------|-------------|-------------|
| C | -1.68499300 | -0.88839400 | -0.41564100 |
| H | -1.68290200 | -1.98401700 | -0.49006200 |
| H | -2.32736100 | -0.54117000 | -1.23502500 |
| C | 0.07417200  | 1.49176600  | -0.74781000 |
| H | 0.91935900  | 1.82632800  | -1.36136900 |
| H | -0.82441500 | 1.83220000  | -1.27903400 |
| C | -2.28699200 | -0.46461600 | 0.93197100  |
| H | -2.43296700 | 0.61780800  | 0.98856500  |
| H | -3.26850300 | -0.93385400 | 1.07149500  |
| H | -1.65796200 | -0.76554800 | 1.77562600  |

TS1 when the PR is P(Et)<sub>3</sub>:

|     |             |             |             |
|-----|-------------|-------------|-------------|
| 0 1 |             |             |             |
| P   | 1.64241800  | -0.54636400 | 0.00641000  |
| C   | 0.36803900  | -1.60534900 | 2.33800600  |
| H   | 1.02912600  | -2.47189900 | 2.42769500  |
| H   | 0.00048600  | -1.36365900 | 3.33990400  |
| H   | -0.49368900 | -1.89095700 | 1.72772300  |
| C   | 3.49927200  | -2.71650200 | 0.41905900  |
| H   | 3.72751900  | -3.75725400 | 0.16380400  |
| H   | 4.36295600  | -2.10894400 | 0.13561800  |
| H   | 3.38107400  | -2.65659900 | 1.50479000  |
| C   | -0.87811000 | 0.82815800  | -0.57890400 |
| C   | -2.01297100 | -0.09091700 | -0.47203300 |
| C   | -3.23835700 | 0.22129800  | 0.17065300  |
| C   | -1.88140100 | -1.39058000 | -1.02237500 |
| C   | -4.26262800 | -0.72031600 | 0.25558400  |
| H   | -3.37306200 | 1.20736100  | 0.59549600  |
| C   | -2.91123700 | -2.32822500 | -0.92680500 |
| H   | -0.96781800 | -1.64802600 | -1.54596200 |
| C   | -4.11164300 | -2.00339100 | -0.28769300 |
| H   | -5.19033400 | -0.44959300 | 0.75346100  |
| H   | -2.77595200 | -3.31504100 | -1.36229700 |
| H   | -4.91596400 | -2.73013600 | -0.21933100 |
| C   | -0.86771700 | 2.17007700  | -0.01625200 |
| O   | 0.22841400  | 0.38971500  | -1.15230100 |
| O   | -1.85048100 | 2.81538600  | 0.36866300  |
| O   | 0.38981100  | 2.71790400  | 0.01700200  |
| C   | 0.47139800  | 4.06671900  | 0.50434400  |
| H   | -0.10673200 | 4.74434500  | -0.12934800 |
| H   | 1.52954400  | 4.32684300  | 0.46478500  |
| H   | 0.10365200  | 4.13525700  | 1.53160100  |
| C   | 2.22365500  | -2.27814900 | -0.32214800 |
| H   | 2.36537000  | -2.35122500 | -1.40607800 |
| H   | 1.38275200  | -2.93426800 | -0.07740100 |
| C   | 3.07671800  | 0.58233300  | -0.22239300 |
| H   | 3.87365600  | 0.28510000  | 0.46971500  |
| H   | 2.71683700  | 1.56736500  | 0.08875400  |
| C   | 1.09443900  | -0.38542800 | 1.75438200  |
| H   | 1.96504800  | -0.11090200 | 2.36132500  |
| H   | 0.42493200  | 0.48575300  | 1.76067200  |
| C   | 3.59433600  | 0.63198100  | -1.66804500 |
| H   | 4.41321500  | 1.35420600  | -1.74184400 |
| H   | 3.97921000  | -0.33822000 | -1.99742000 |
| H   | 2.80718800  | 0.94165300  | -2.36099700 |

PO(Et)<sub>3</sub>:

|     |             |             |             |
|-----|-------------|-------------|-------------|
| 0 1 |             |             |             |
| P   | 0.05727000  | -0.44642600 | -0.44713100 |
| C   | 2.50836100  | -0.19672700 | 0.94781900  |
| H   | 2.69090500  | 0.81278300  | 0.56493100  |
| H   | 3.02544600  | -0.28474200 | 1.90845000  |
| H   | 2.96230900  | -0.90802700 | 0.25212800  |
| C   | -0.11800600 | 2.43081000  | -0.01393700 |
| H   | -0.12172700 | 3.39787500  | -0.52702800 |
| H   | -1.04374700 | 2.36092900  | 0.56241200  |



|   |             |             |             |
|---|-------------|-------------|-------------|
| H | 0.71775400  | 2.43715500  | 0.69192400  |
| C | 1.00871900  | -0.47930900 | 1.12664600  |
| H | 0.85927000  | -1.48103300 | 1.54752800  |
| H | 0.55887100  | 0.23063200  | 1.82972100  |
| C | -1.65489800 | -0.97744500 | -0.02342200 |
| H | -1.54567200 | -2.02500400 | 0.28361700  |
| H | -2.19566400 | -0.99257700 | -0.97733800 |
| C | 0.01882600  | 1.29931100  | -1.04486000 |
| H | 0.95271100  | 1.41349400  | -1.60749300 |
| H | -0.78956500 | 1.34569400  | -1.78476700 |
| C | -2.44617900 | -0.19128300 | 1.03241600  |
| H | -2.66590000 | 0.82772600  | 0.70289300  |
| H | -3.40402700 | -0.68741100 | 1.21906000  |
| H | -1.91535200 | -0.13451000 | 1.98772600  |
| O | 0.64429900  | -1.36609100 | -1.51184800 |

P(Me)<sub>3</sub>:

|     |             |             |             |
|-----|-------------|-------------|-------------|
| O 1 |             |             |             |
| P   | -0.00031000 | -0.00009500 | -0.59527500 |
| C   | 0.84421400  | 1.41493500  | 0.27551700  |
| H   | 1.89630100  | 1.45304200  | -0.02432900 |
| H   | 0.37571600  | 2.35891400  | -0.02038200 |
| H   | 0.79004000  | 1.31900700  | 1.36663900  |
| C   | -1.64773100 | 0.02333100  | 0.27586400  |
| H   | -2.20574700 | 0.91707300  | -0.02093000 |
| H   | -2.23187600 | -0.85272500 | -0.02328100 |
| H   | -1.53755600 | 0.02026600  | 1.36694100  |
| C   | 0.80392700  | -1.43813600 | 0.27564600  |
| H   | 0.30892300  | -2.36838300 | -0.02069300 |
| H   | 1.85460000  | -1.50591200 | -0.02373800 |
| H   | 0.75179000  | -1.34063700 | 1.36673100  |

TS1 when the PR is P(Me)<sub>3</sub>:

|     |             |             |             |
|-----|-------------|-------------|-------------|
| O 1 |             |             |             |
| P   | -1.68679900 | -1.48319200 | 0.09767100  |
| C   | -1.47293400 | -0.78166900 | 1.76626200  |
| H   | -0.68213000 | -0.01952900 | 1.71657400  |
| H   | -2.39023300 | -0.30010500 | 2.11335600  |
| H   | -1.16870300 | -1.55883600 | 2.47010300  |
| C   | -3.37700000 | -1.14195500 | -0.49665100 |
| H   | -3.53339800 | -0.06162900 | -0.49533300 |
| H   | -3.47840500 | -1.51380000 | -1.52012700 |
| H   | -4.12255500 | -1.63098600 | 0.13857500  |
| C   | -1.54364100 | -3.31711400 | 0.21698600  |
| H   | -1.59386800 | -3.74635000 | -0.78689700 |
| H   | -0.58314500 | -3.57739000 | 0.66678100  |
| H   | -2.35833200 | -3.72816300 | 0.82508600  |
| C   | 0.21202900  | 0.62213500  | -0.57289900 |
| C   | 1.59413500  | 0.21212200  | -0.31149300 |
| C   | 2.57813100  | 1.04509500  | 0.27882200  |
| C   | 1.97675200  | -1.11076900 | -0.64567600 |
| C   | 3.86661300  | 0.57016200  | 0.51895800  |
| H   | 2.31848800  | 2.06219700  | 0.54136000  |
| C   | 3.26726000  | -1.57906600 | -0.39315800 |
| H   | 1.25239400  | -1.76145000 | -1.12185800 |
| C   | 4.22509000  | -0.74403800 | 0.19021700  |
| H   | 4.59963200  | 1.23397600  | 0.97034200  |
| H   | 3.52643600  | -2.59976600 | -0.66277600 |
| H   | 5.23173000  | -1.10540600 | 0.37949100  |
| C   | -0.34127000 | 1.91161400  | -0.18100100 |
| O   | -0.60549900 | -0.25384400 | -1.12570700 |
| O   | 0.29680500  | 2.91638800  | 0.15344000  |
| O   | -1.70988900 | 1.93725600  | -0.25386200 |
| C   | -2.33003400 | 3.19156200  | 0.07271800  |
| H   | -2.00344100 | 3.97642600  | -0.61440600 |
| H   | -2.09268900 | 3.48984500  | 1.09724600  |

H -3.40192300 3.02197400 -0.03205200

PO(Me)<sub>3</sub>:

0 1

P 0.00025000 -0.00003600 0.16631900  
C -0.80914000 1.47503500 -0.54652800  
H -1.84702500 1.51567900 -0.20406300  
H -0.28898400 2.37268900 -0.20038100  
H -0.79167400 1.44760000 -1.63993400  
C 1.68179100 -0.03703500 -0.54808400  
H 2.23824900 0.83834200 -0.20133700  
H 2.19696400 -0.93935800 -0.20678900  
H 1.64909000 -0.03288100 -1.64147200  
C -0.87368400 -1.43737100 -0.54740900  
H -0.39167400 -2.35726000 -0.20444400  
H -1.91142300 -1.43396100 -0.20211800  
H -0.85798000 -1.40852200 -1.64080800  
O 0.00086400 -0.00069600 1.68733500

PPh<sub>3</sub>:

0 1

P -0.00359600 0.00449300 -1.19825600  
C 0.27919500 1.65460200 -0.39939900  
C -0.30634200 2.77302100 -1.02024800  
C 1.06092500 1.85819200 0.74944400  
C -0.13575800 4.05623600 -0.49466900  
H -0.89869400 2.64013500 -1.92241600  
C 1.24340100 3.14422900 1.26893900  
H 1.53257100 1.01412700 1.24274000  
C 0.64299400 4.24555400 0.65193500  
H -0.60021600 4.90646900 -0.98603900  
H 1.85313500 3.28277600 2.15745300  
H 0.78542800 5.24332700 1.05676100  
C 1.28663400 -1.06480300 -0.40243500  
C 1.07132100 -1.85267800 0.73979600  
C 2.55006900 -1.10702000 -1.01983000  
C 2.09495000 -2.65452800 1.25596600  
H 0.10306000 -1.84410700 1.23009600  
C 3.57705700 -1.89716300 -0.49760400  
H 2.73175600 -0.51908200 -1.91637800  
C 3.35064500 -2.67631000 0.64210000  
H 1.90984000 -3.25905600 2.13953900  
H 4.54719800 -1.91293400 -0.98610200  
H 4.14435200 -3.29929400 1.04414200  
C -1.57156800 -0.58033600 -0.39807100  
C -2.23792800 -1.65469600 -1.01523300  
C -2.14394300 -0.00495700 0.74774800  
C -3.43044500 -2.15677000 -0.48848800  
H -1.82169200 -2.10160700 -1.91495700  
C -3.34546100 -0.49787300 1.26813700  
H -1.65444100 0.83039400 1.23840500  
C -3.98940700 -1.57669600 0.65528400  
H -3.92693400 -2.99065700 -0.97652000  
H -3.77489600 -0.03923900 2.15451600  
H -4.92163200 -1.95853100 1.06134300

TS1 when the PR is PPh<sub>3</sub>:

0 1

|   |             |             |             |
|---|-------------|-------------|-------------|
| C | 1.49701400  | -0.94460100 | -1.14645000 |
| C | 2.70503500  | -0.12391500 | -1.03788400 |
| C | 3.99782900  | -0.64114400 | -0.76544800 |
| C | 2.59292100  | 1.27889000  | -1.20670000 |
| C | 5.10272500  | 0.20406100  | -0.66838600 |
| H | 4.12121500  | -1.70782200 | -0.63623500 |
| C | 3.70312800  | 2.11663000  | -1.10022800 |
| H | 1.62446000  | 1.70676100  | -1.43470500 |
| C | 4.97015800  | 1.58887000  | -0.83072000 |
| H | 6.07939600  | -0.22569100 | -0.46066100 |
| H | 3.57640000  | 3.18774100  | -1.23496600 |
| H | 5.83569000  | 2.24027000  | -0.75212400 |
| C | 1.47694600  | -2.38665200 | -0.95264900 |
| O | 0.34366600  | -0.34573700 | -1.40693300 |
| O | 2.45893200  | -3.12872800 | -0.83203500 |
| O | 0.20694300  | -2.90096900 | -0.95872800 |
| C | 0.10840000  | -4.32343300 | -0.78360600 |
| H | 0.54167400  | -4.62954300 | 0.17206500  |
| H | 0.61761400  | -4.85056400 | -1.59450200 |
| H | -0.95890800 | -4.54550400 | -0.80162800 |
| P | -0.86601100 | 0.34826400  | 0.03476600  |
| C | -0.77832000 | 2.13243600  | 0.32929400  |
| C | -0.96655600 | 2.99658200  | -0.76951000 |
| C | -0.46197200 | 2.67922800  | 1.58722500  |
| C | -0.85121000 | 4.37644500  | -0.60596400 |
| H | -1.20349800 | 2.59263500  | -1.74951600 |
| C | -0.34310300 | 4.06161300  | 1.73963300  |
| H | -0.31846500 | 2.03227300  | 2.44560400  |
| C | -0.53606900 | 4.91357300  | 0.64738300  |
| H | -1.00278800 | 5.03117500  | -1.45871600 |
| H | -0.10589400 | 4.47230400  | 2.71644900  |
| H | -0.44314200 | 5.98813300  | 0.77133000  |
| C | -0.52169700 | -0.56973800 | 1.54126500  |
| C | -1.47317400 | -1.42298200 | 2.13390100  |
| C | 0.78530800  | -0.51699600 | 2.06697200  |
| C | -1.12864500 | -2.18272900 | 3.25006900  |
| H | -2.47790600 | -1.48451100 | 1.72925100  |
| C | 1.11941000  | -1.28178000 | 3.18807400  |
| H | 1.53527200  | 0.12485000  | 1.61577000  |
| C | 0.16653100  | -2.11339000 | 3.78011200  |
| H | -1.87200500 | -2.82662000 | 3.71028400  |
| H | 2.12602200  | -1.22905100 | 3.59119100  |
| H | 0.42940100  | -2.70833100 | 4.64954000  |
| C | -2.50060100 | -0.04862900 | -0.63005500 |
| C | -2.66530300 | -1.25232000 | -1.34103500 |
| C | -3.59775900 | 0.81650000  | -0.46041900 |
| C | -3.91732300 | -1.58540300 | -1.86271200 |
| H | -1.81673700 | -1.91292600 | -1.47991800 |
| C | -4.84325300 | 0.47550900  | -0.98902500 |
| H | -3.48351100 | 1.74719500  | 0.08471200  |
| C | -5.00525500 | -0.72463800 | -1.68997700 |
| H | -4.03939500 | -2.51517600 | -2.41010300 |
| H | -5.68621600 | 1.14571400  | -0.85075400 |
| H | -5.97582900 | -0.98572600 | -2.10123000 |

POPh<sub>3</sub>:

0 1

|   |            |             |             |
|---|------------|-------------|-------------|
| P | 0.00408400 | -0.01508400 | 0.91651000  |
| C | 1.19150500 | -1.21722300 | 0.21054900  |
| C | 1.43916800 | -2.39190400 | 0.93997900  |
| C | 1.85540500 | -1.01043000 | -1.00854000 |
| C | 2.33047700 | -3.34947000 | 0.45085600  |
| H | 0.94188000 | -2.54843200 | 1.89229800  |
| C | 2.74674000 | -1.97079700 | -1.49570000 |
| H | 1.68811600 | -0.10130000 | -1.57775600 |
| C | 2.98398700 | -3.14073400 | -0.76825200 |

|   |             |             |             |
|---|-------------|-------------|-------------|
| H | 2.51767500  | -4.25357300 | 1.02254800  |
| H | 3.25808100  | -1.80101200 | -2.43854800 |
| H | 3.67935900  | -3.88420300 | -1.14665500 |
| C | 0.45443800  | 1.62706000  | 0.24380000  |
| C | -0.05576900 | 2.12125300  | -0.96659700 |
| C | 1.35177400  | 2.41231200  | 0.98630200  |
| C | 0.33581500  | 3.37964100  | -1.43295600 |
| H | -0.76276600 | 1.53374300  | -1.54428400 |
| C | 1.73984800  | 3.66969900  | 0.51873300  |
| H | 1.73563500  | 2.04185800  | 1.93195700  |
| C | 1.23387400  | 4.15375600  | -0.69238600 |
| H | -0.06513300 | 3.75516800  | -2.36970600 |
| H | 2.43163100  | 4.27153900  | 1.10053500  |
| H | 1.53405000  | 5.13270000  | -1.05441700 |
| C | -1.64150400 | -0.42793100 | 0.22758200  |
| C | -2.77090400 | 0.05572200  | 0.91001000  |
| C | -1.81614800 | -1.20223300 | -0.92931200 |
| C | -4.05382000 | -0.22471100 | 0.43618800  |
| H | -2.64470900 | 0.64304500  | 1.81455200  |
| C | -3.10241400 | -1.48203500 | -1.40128100 |
| H | -0.95555600 | -1.59425500 | -1.46195200 |
| C | -4.22106900 | -0.99335600 | -0.72101100 |
| H | -4.92054400 | 0.15191300  | 0.97115500  |
| H | -3.22758100 | -2.08461300 | -2.29599200 |
| H | -5.21931900 | -1.21376500 | -1.08760800 |
| O | 0.00974400  | -0.03143200 | 2.43297200  |
